# Supplementary material
Source: publisher figshare collection journal article supplement (https://acs.figshare.com/ndownloader/files/5183524)

# Supporting Information

## Improved Chemical Synthesis of 1- and 5-Deazariboflavin.

Erin E. Carlson and Laura L. Kiessling

### Table of Contents:

|                 |                                                                          |
|-----------------|--------------------------------------------------------------------------|
| Page 2.         | General Experimental Procedures.                                         |
| Page 3 and 4.   | $^1\text{H}$ and $^{13}\text{C}$ NMR spectra of compound 1.              |
| Page 5 and 6.   | $^1\text{H}$ and $^{13}\text{C}$ NMR spectra of compound 2.              |
| Page 7 and 8.   | $^1\text{H}$ and $^{13}\text{C}$ NMR spectra of compound 4.              |
| Page 9.         | $^1\text{H}$ NMR spectrum of compound 5.                                 |
| Page 10 and 11. | $^1\text{H}$ and $^{13}\text{C}$ NMR spectra of compound 6.              |
| Page 12 and 13. | $^1\text{H}$ and $^{13}\text{C}$ NMR spectra of compound 7.              |
| Page 14 and 15. | $^1\text{H}$ and $^{13}\text{C}$ NMR spectra of compound 9.              |
| Page 16 and 17. | $^1\text{H}$ and $^{13}\text{C}$ NMR spectra of compound 9 intermediate. |
| Page 18 and 19. | $^1\text{H}$ and $^{13}\text{C}$ NMR spectra of compound 10.             |
| Page 20.        | $^1\text{H}$ NMR spectrum of compound 11.                                |
| Page 21 and 22. | $^1\text{H}$ and $^{13}\text{C}$ NMR spectra of compound 12.             |

All moisture- and oxygen-sensitive reactions were carried out in flame-dried glassware under nitrogen atmosphere. All materials were purchased and used without further purification, unless otherwise noted. Dichloromethane ( $\text{CH}_2\text{Cl}_2$ ) was distilled from calcium hydride, methanol was distilled from magnesium and pyridine was distilled from sodium and anthracene. Dimethylformamide (DMF) was rendered amine-free by treatment with Dowex 50WX8-200 cation exchange resin,  $\text{H}^+$  form, 1 g/L. Analytical thin layer chromatography (TLC) was carried out on TLC plates pre-coated with silica gel 60  $\text{F}_{254}$  (250  $\mu\text{m}$  layer thickness). Analyte visualization was accomplished using a UV lamp, and charring with at least one of the following solutions: a *p*-anisaldehyde stain (18 mL *p*-anisaldehyde, 7.5 mL glacial acetic acid, 25 mL concentrated  $\text{H}_2\text{SO}_4$ , 675 mL absolute EtOH), ninhydrin stain (200 mg ninhydrin, 95 mL *n*-butanol, 5 mL 10% AcOH), or potassium permanganate stain (3 g  $\text{KMnO}_4$ , 20 g  $\text{K}_2\text{CO}_3$ , 5 mL 5% aqueous NaOH, 300 mL  $\text{H}_2\text{O}$ ). Flash chromatography was performed on silica gel (32-63  $\mu\text{M}$ , 60 Å pore size) using distilled reagent grade hexanes and ACS grade ethyl acetate (EtOAc) or methanol and chloroform. The term, “concentrated under reduced pressure” refers to the removal of solvents and other volatile materials using a rotary evaporator at water aspirator pressure (< 20 torr) while maintaining the water bath temperature below 40 °C, followed by residual solvent removal at high vacuum (< 0.1 torr). The term, “high vacuum,” refers to vacuum achieved by a mechanical belt-drive oil pump. High performance liquid chromatography (HPLC) was performed on a  $\text{C}_{18}$  reverse phase column using water (A) and acetonitrile (B) buffered with 1% trifluoroacetic acid as the elution solvent. Compound elution was detected by UV at 254 and 280 nm.  $^1\text{H}$  and  $^{13}\text{C}$  nuclear magnetic resonance (NMR) spectra were recorded on Bruker AC-300 and chemical shifts are reported relative to tetramethylsilane or residual solvent peaks in parts per million ( $\text{CHCl}_3$ :  $^1\text{H}$ :  $\delta$  7.26,  $^{13}\text{C}$ :  $\delta$  77.0;  $\text{CH}_3\text{OH}$ :  $^1\text{H}$ :  $\delta$  3.31,  $^{13}\text{C}$ :  $\delta$  49.15, DMSO:  $^1\text{H}$   $\delta$  2.50,  $^{13}\text{C}$ :  $\delta$  39.51)  $^1\text{H}$  NMR data are assumed to be first order. Peak multiplicity is reported as: singlet (s), doublet (d), triplet (t), quartet (q), multiplet (m), and broad (br). Mass spectrometry was performed on Micromass LCT Electrospray ionization (ESI).

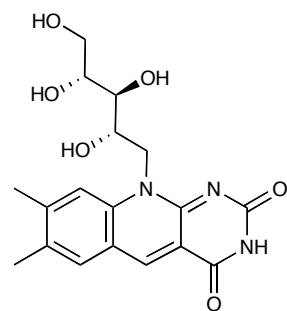

5-Deazariboflavin 1

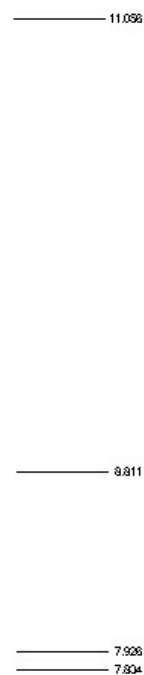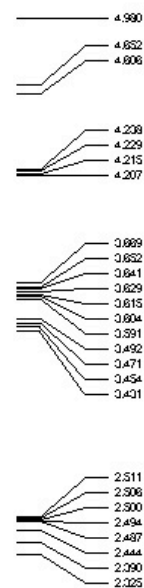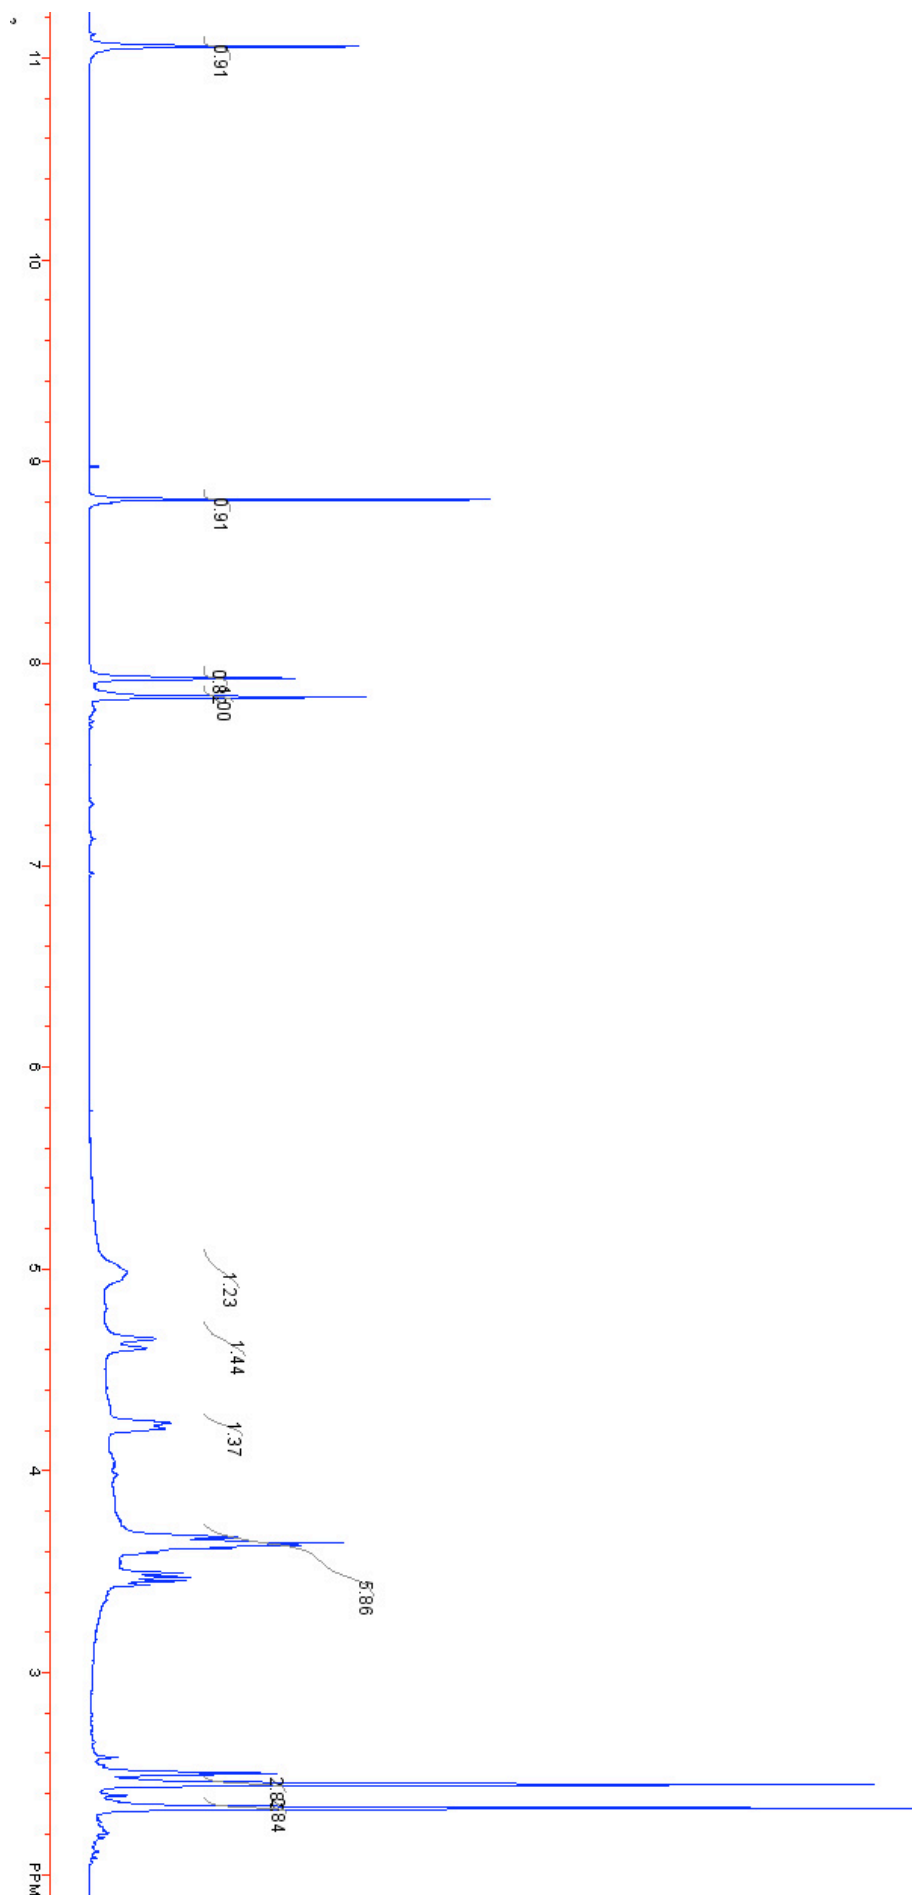

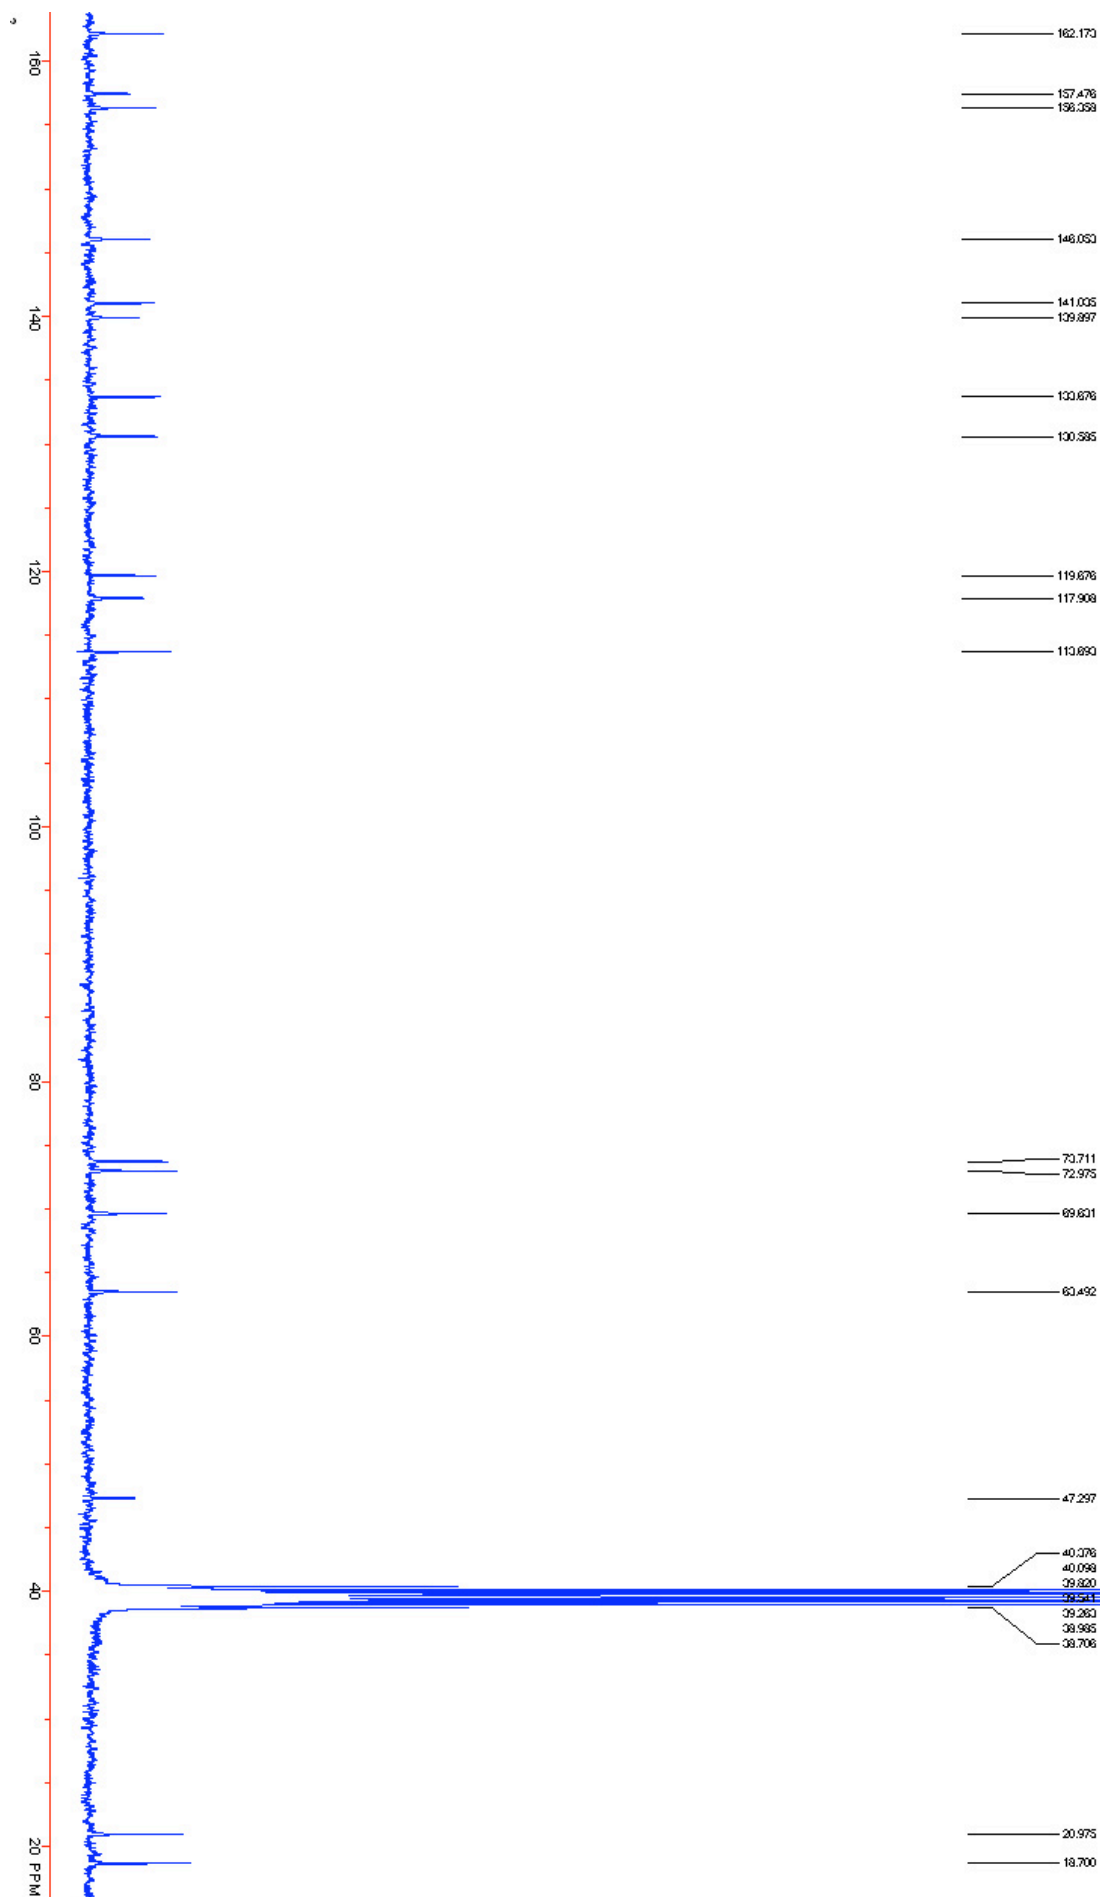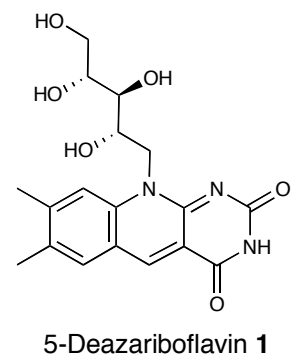

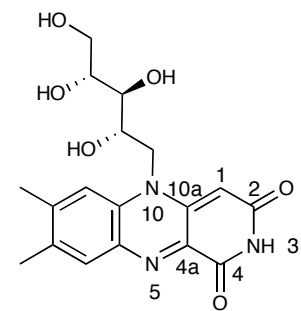

1-Deazariboflavin **2**

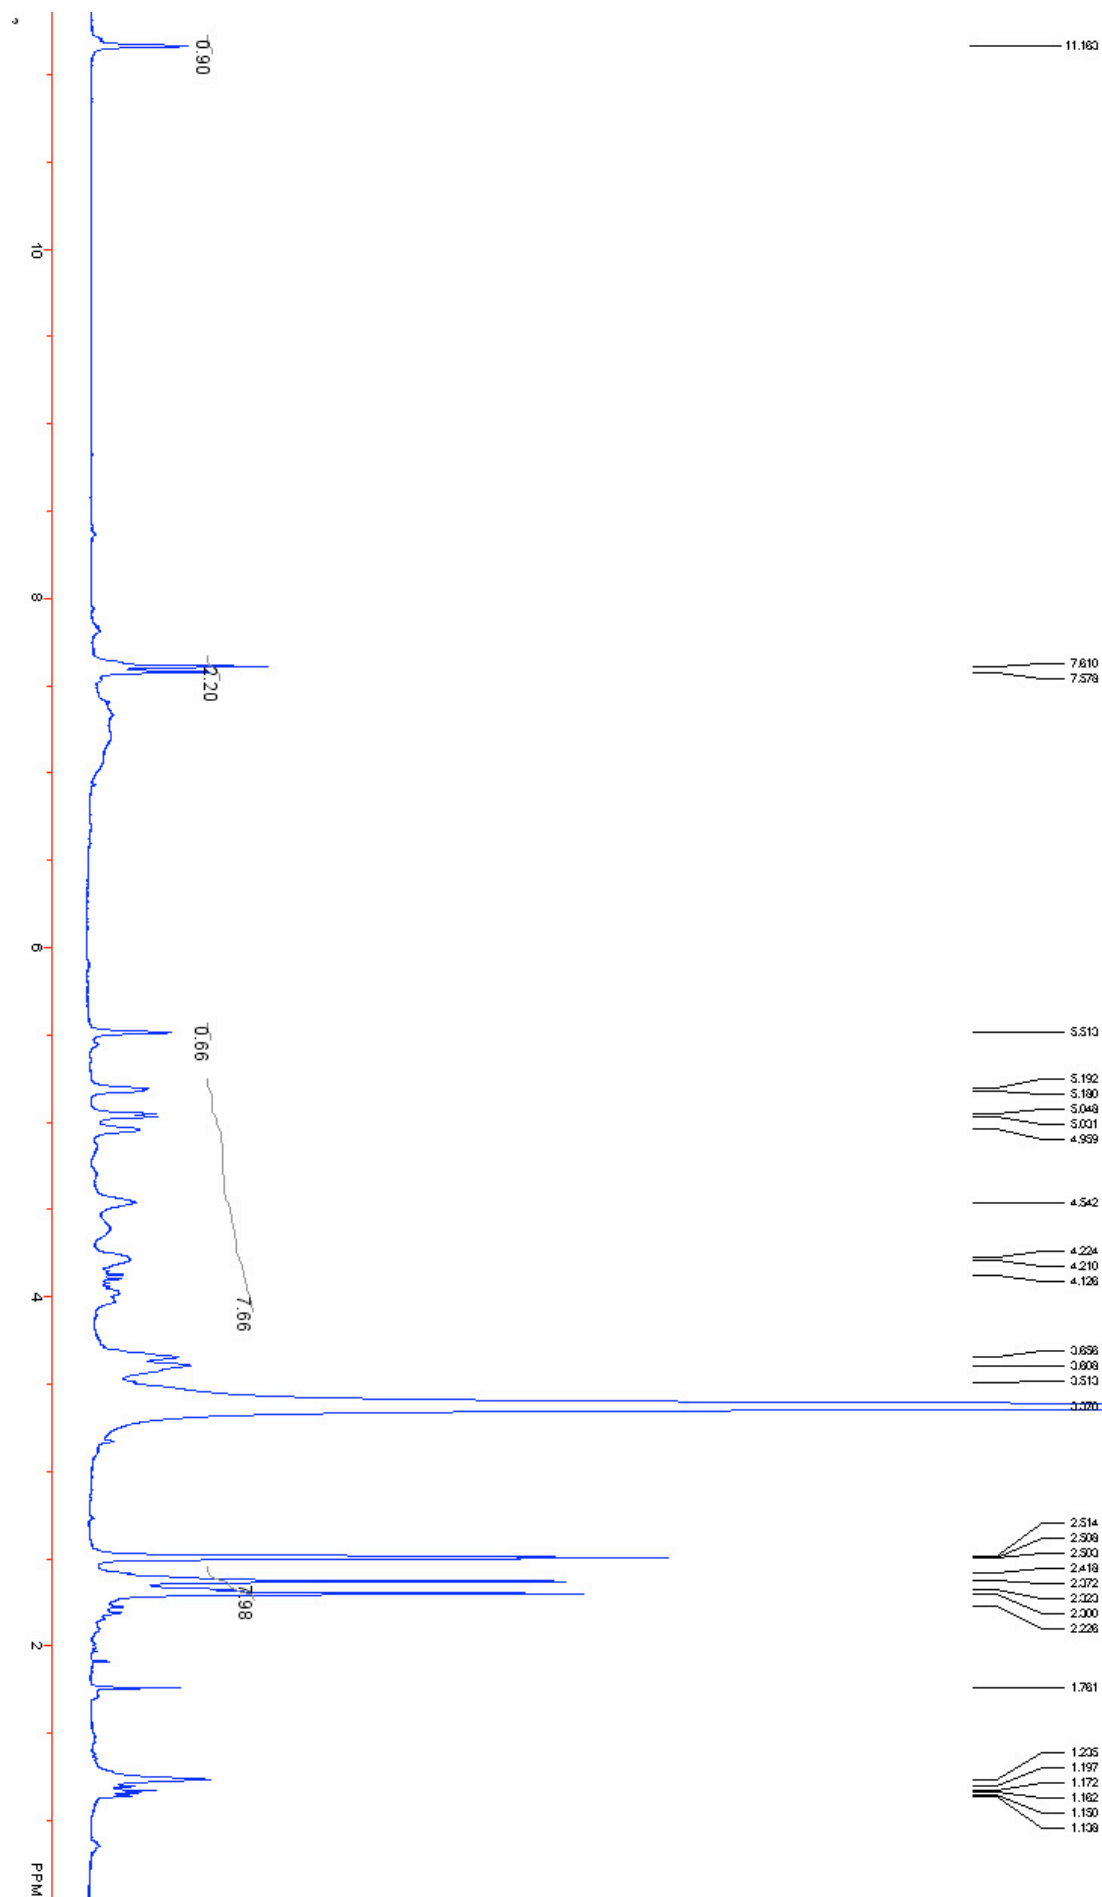

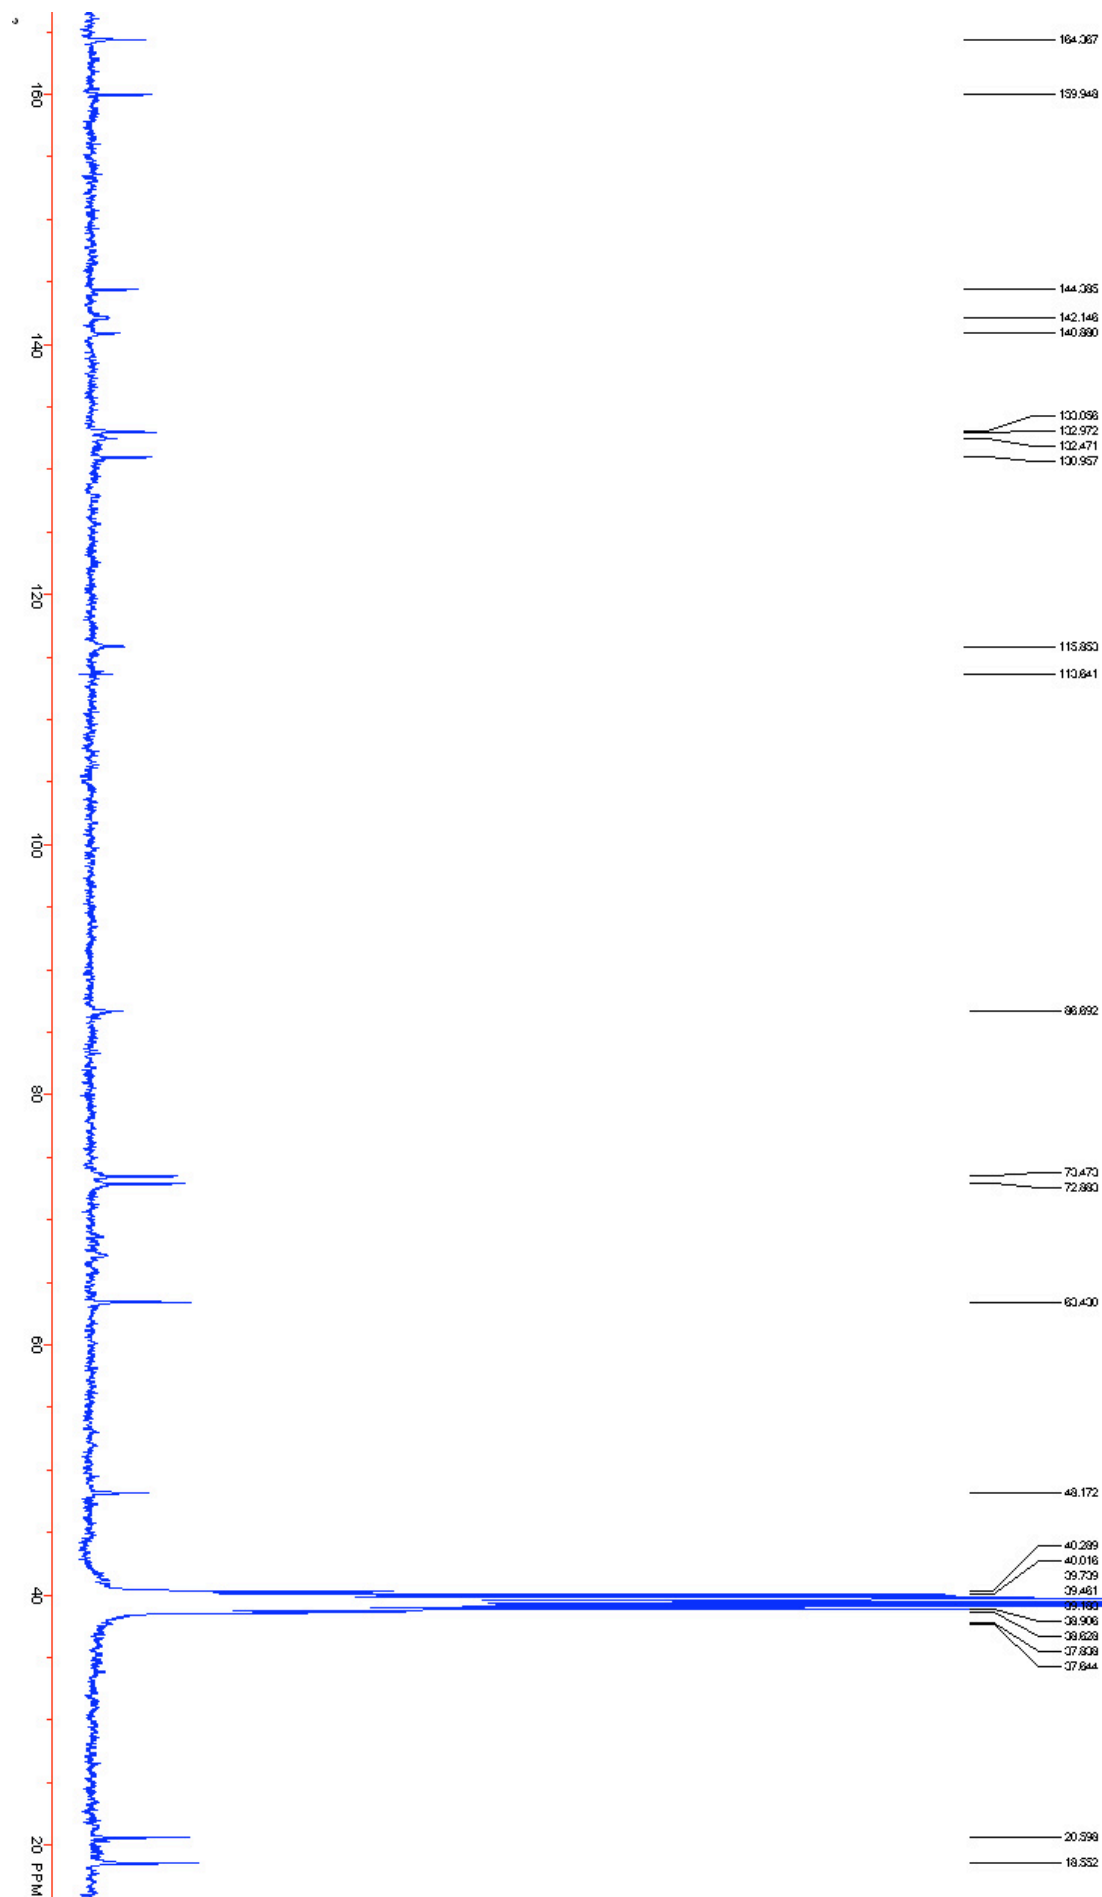

1-Deazariboflavin 2

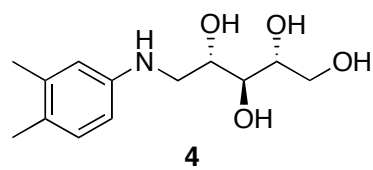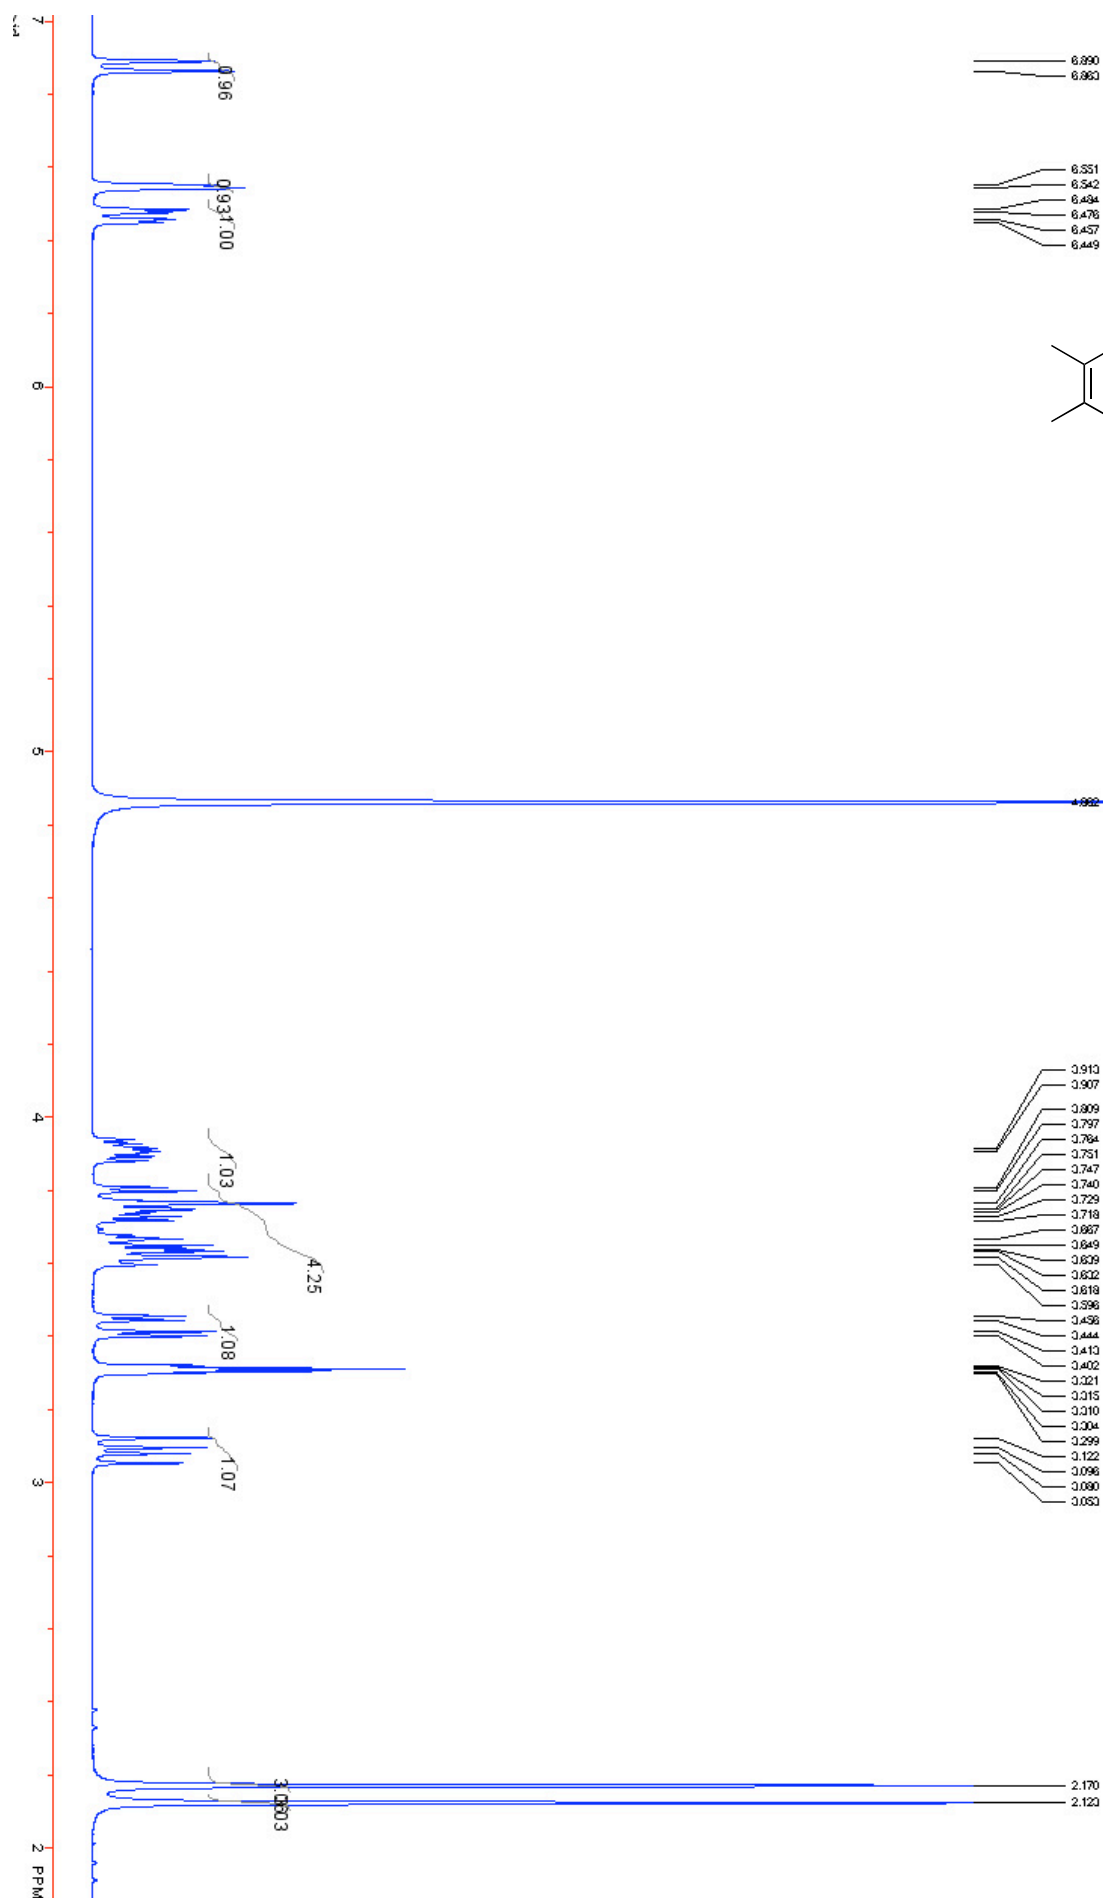

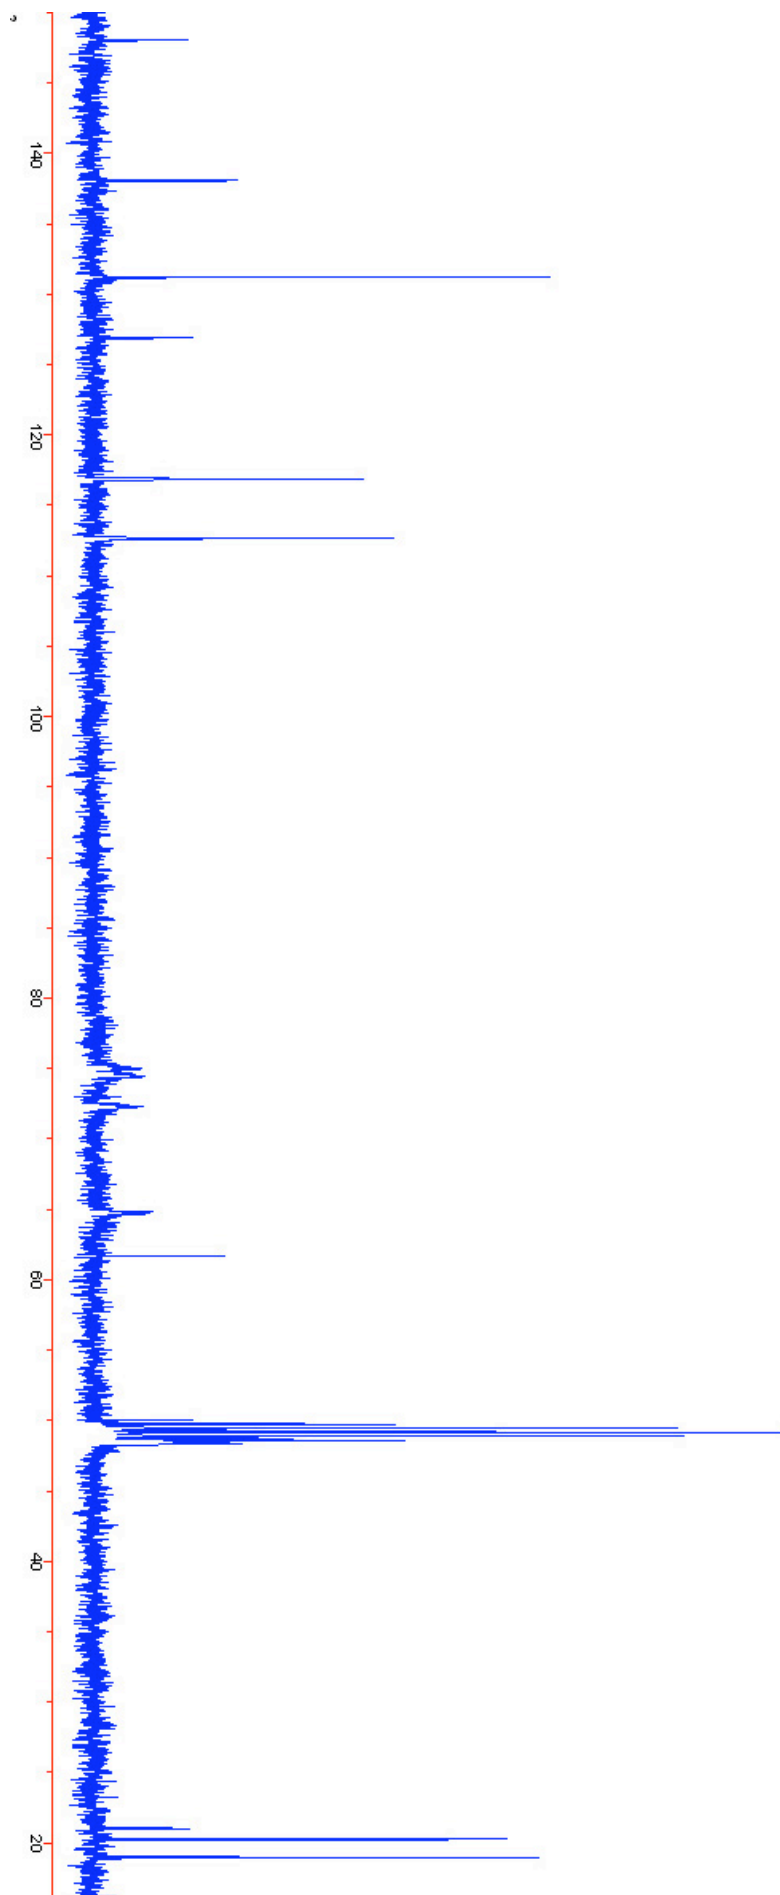

149.050

139.060

131.210

126.865

116.862

112.860

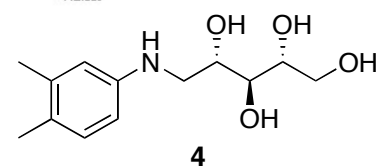

74.965

74.492

72.270

64.808

64.723

61.652

49.998

49.717

49.430

49.341

49.130

48.861

48.580

48.405

48.204

20.987

20.214

19.937



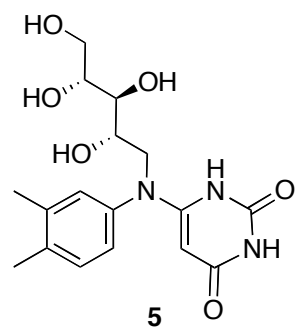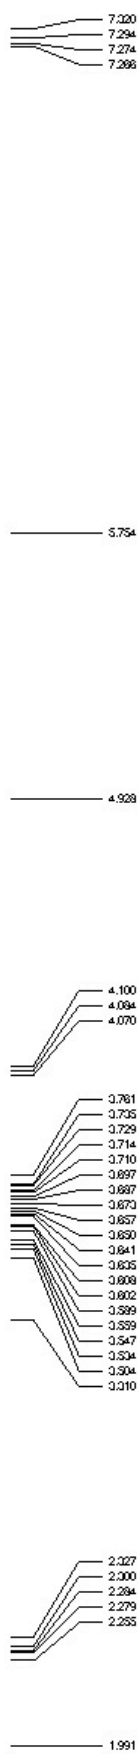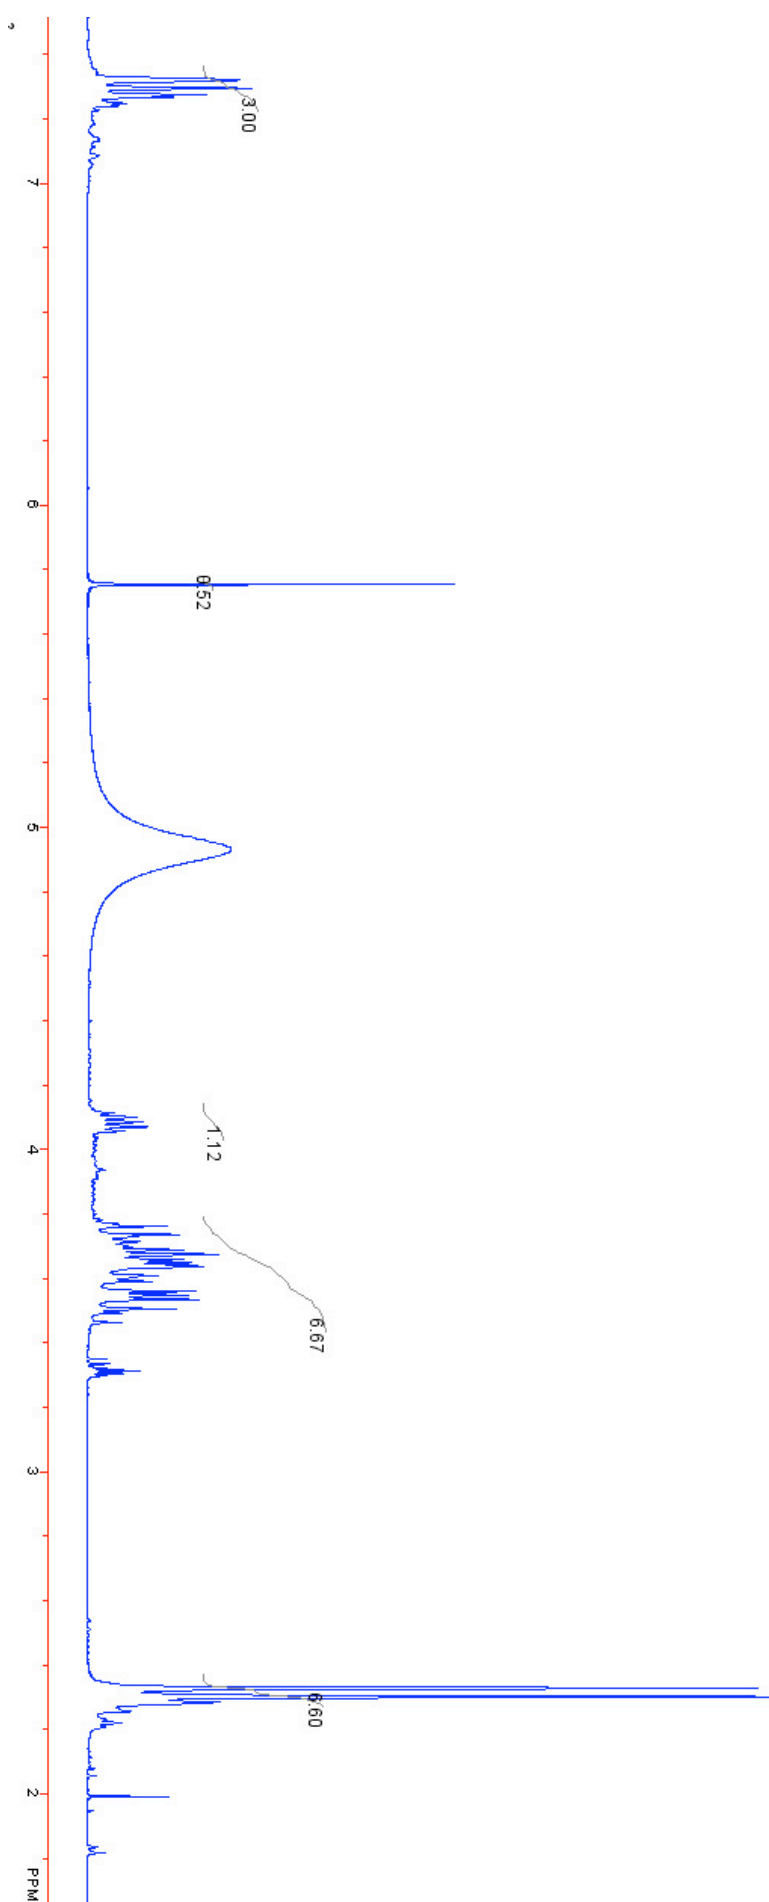

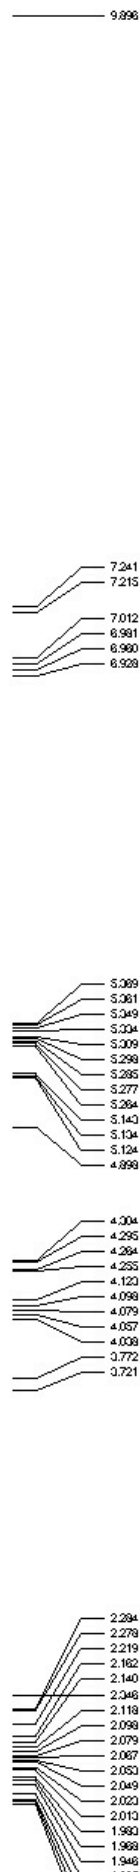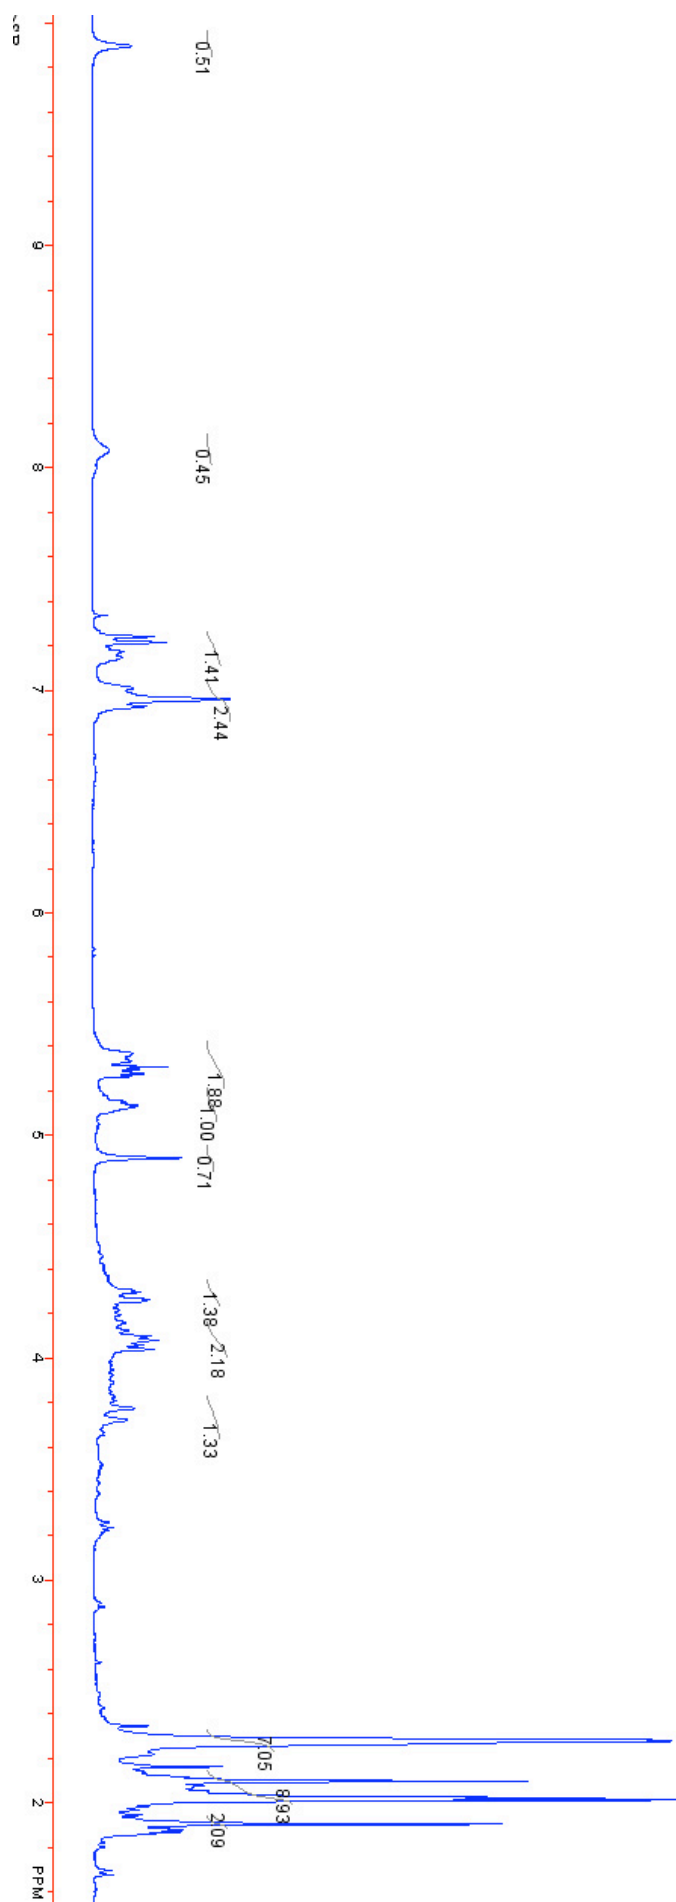

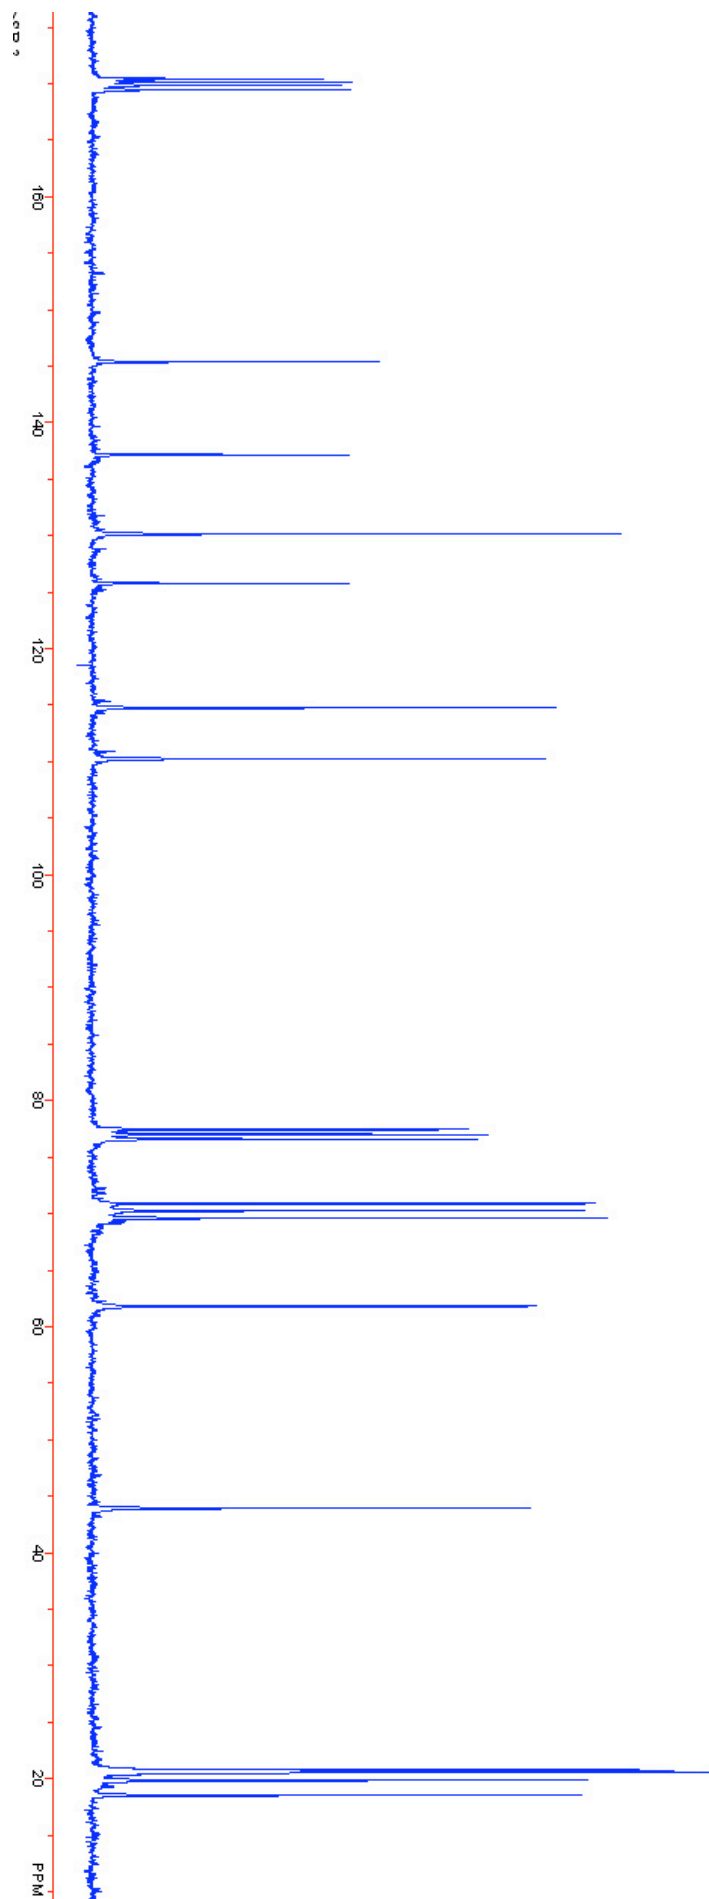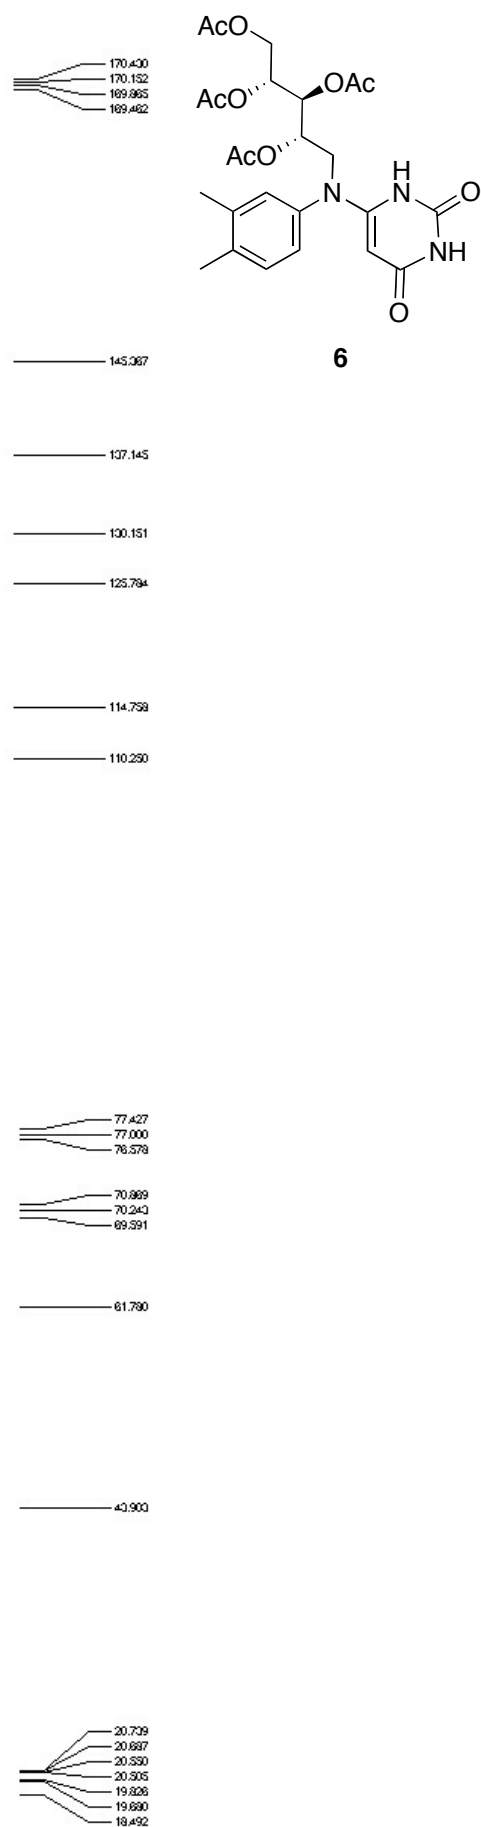

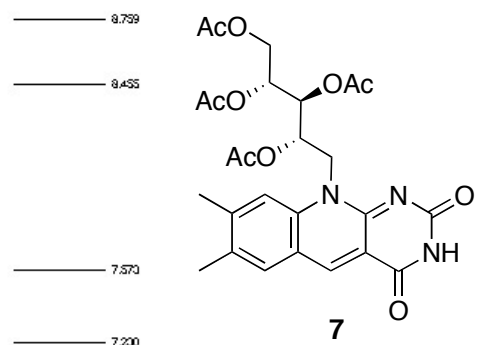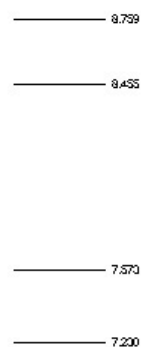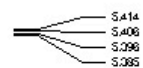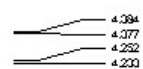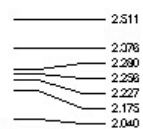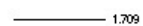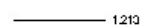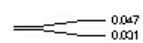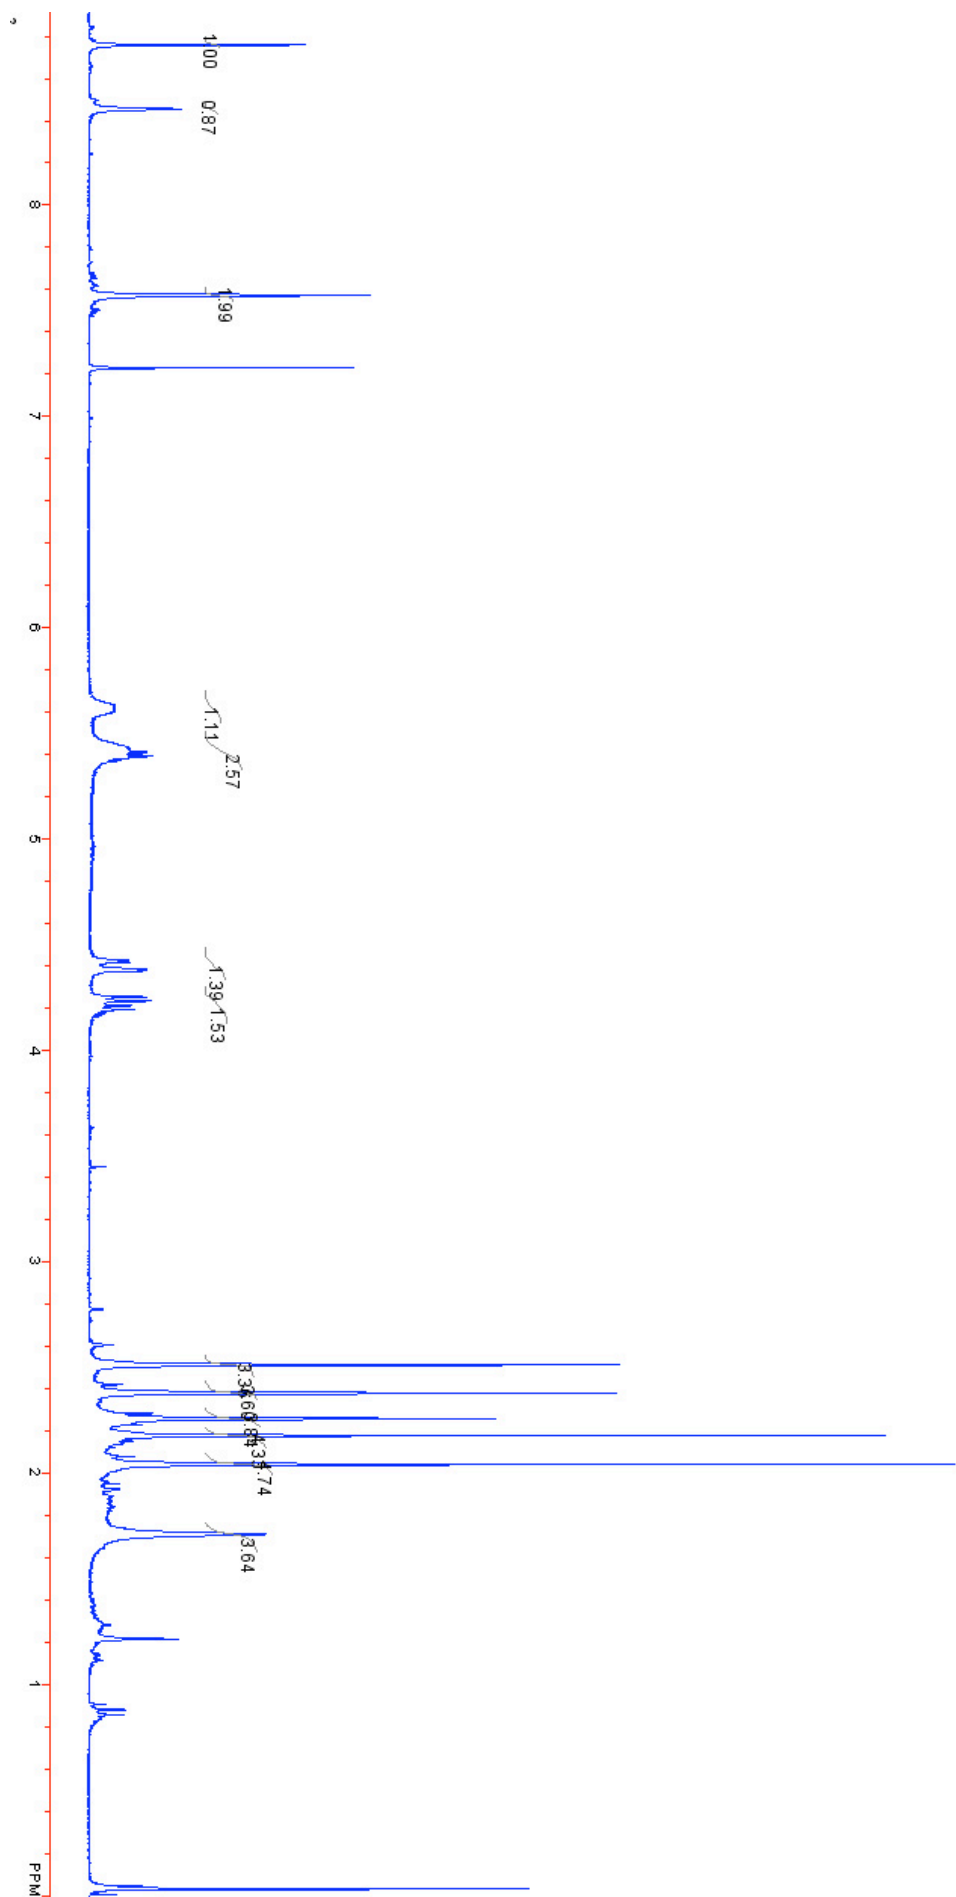

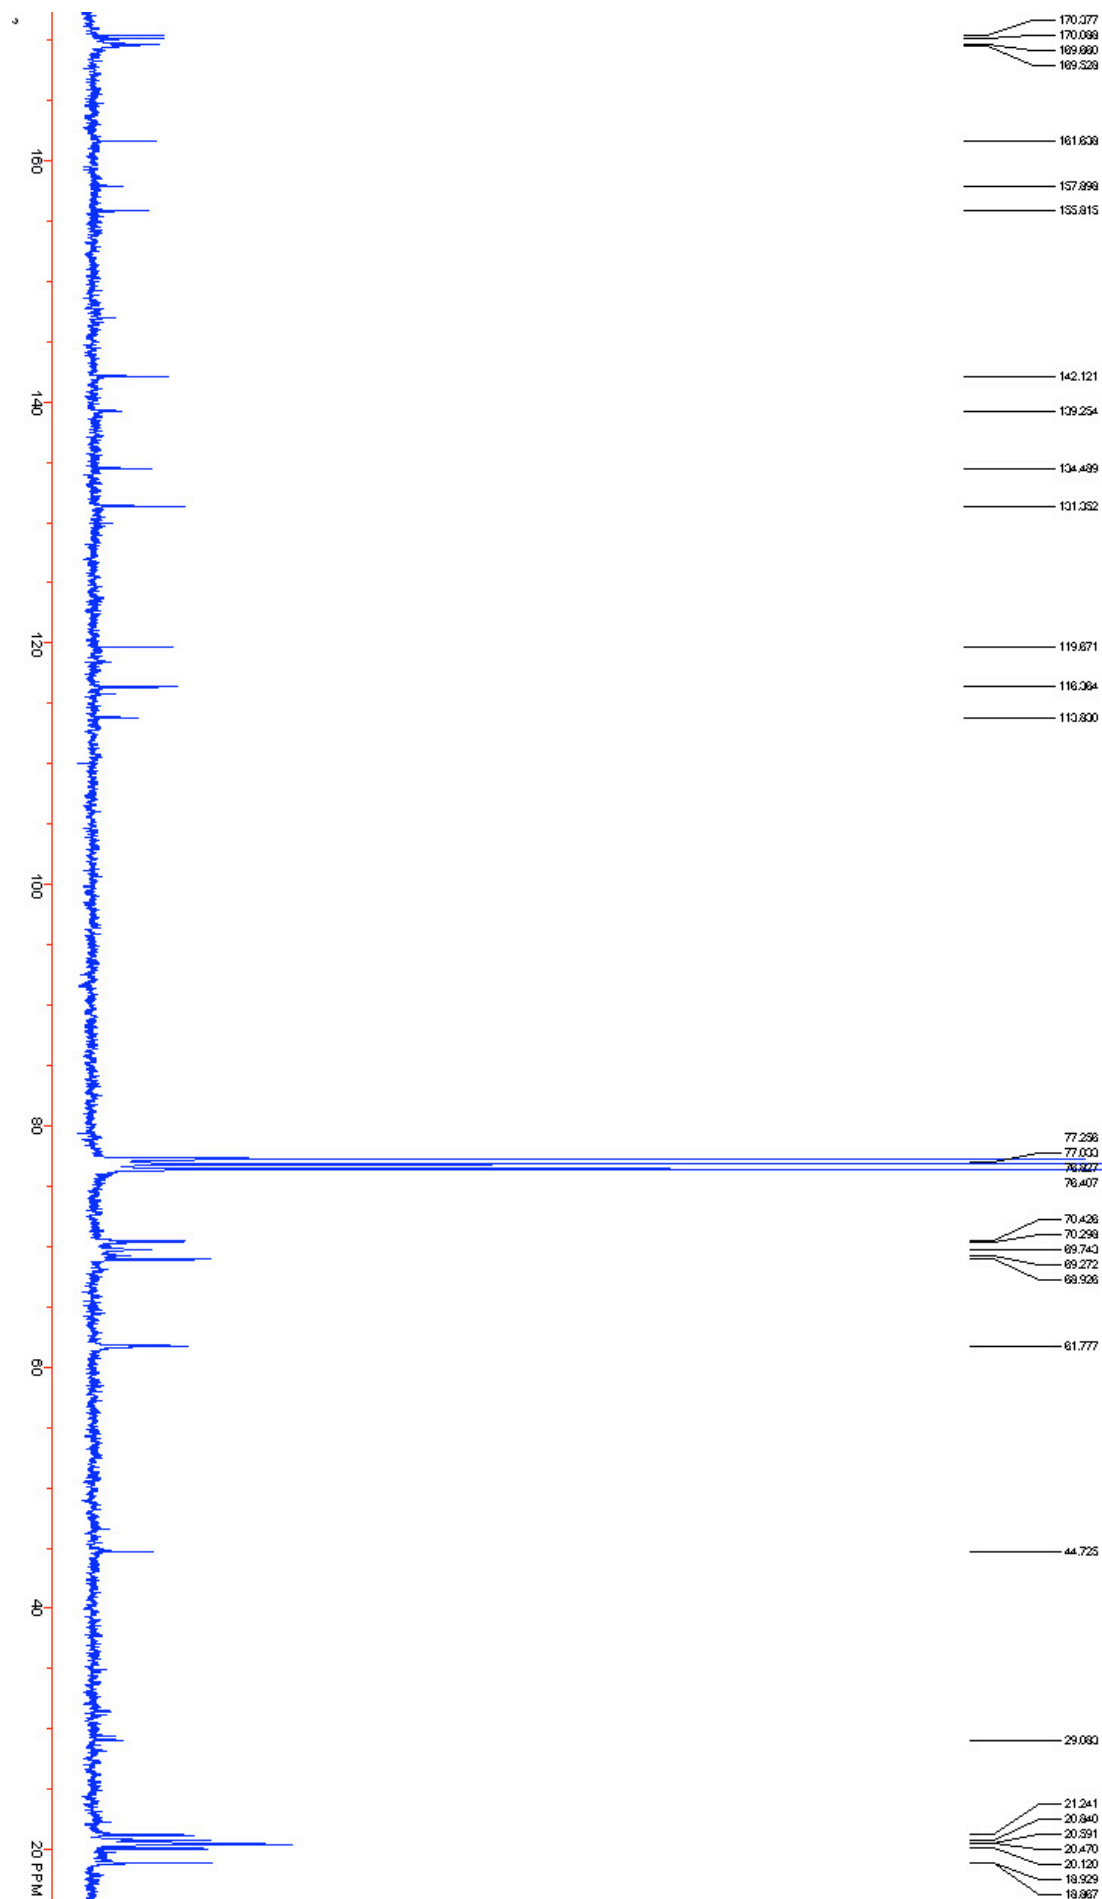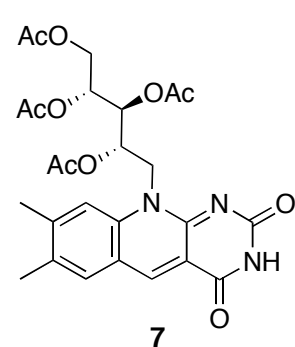

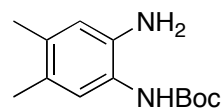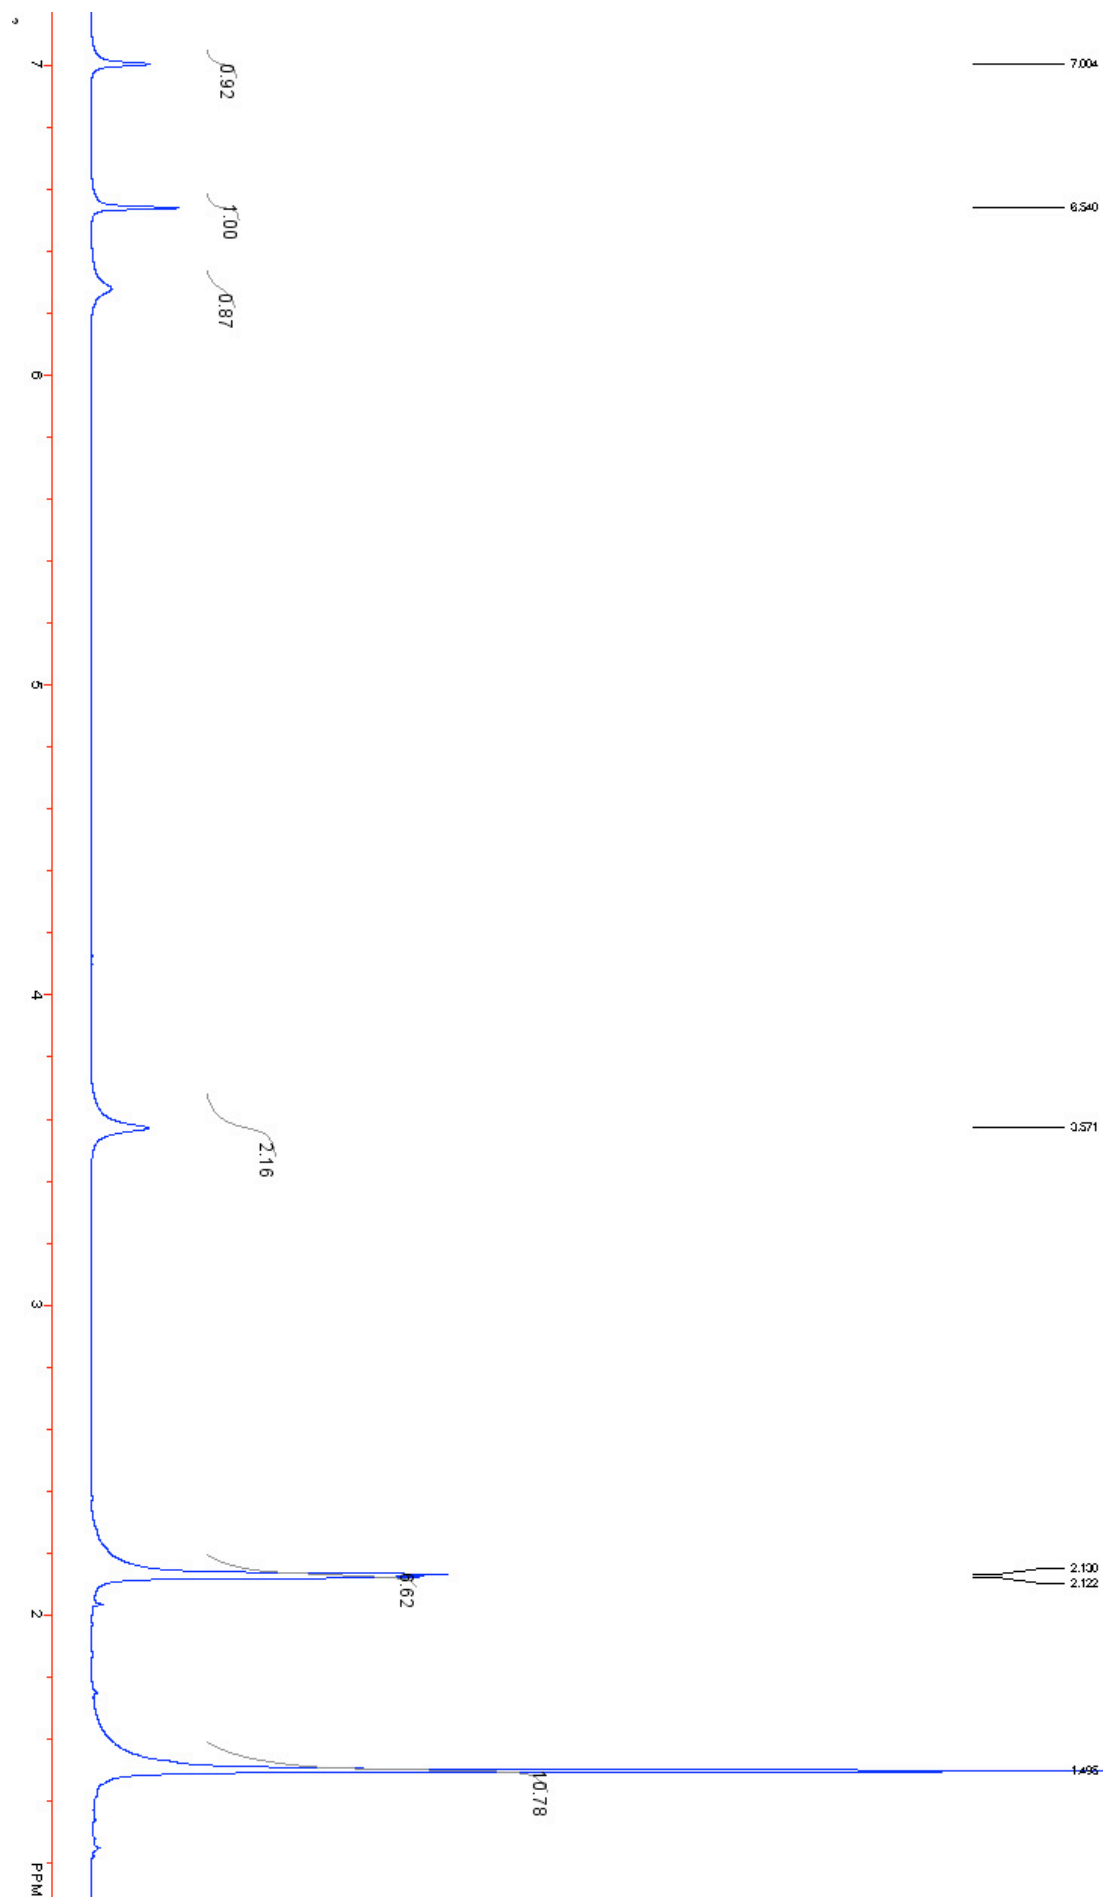

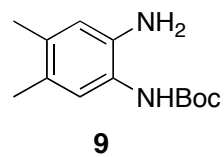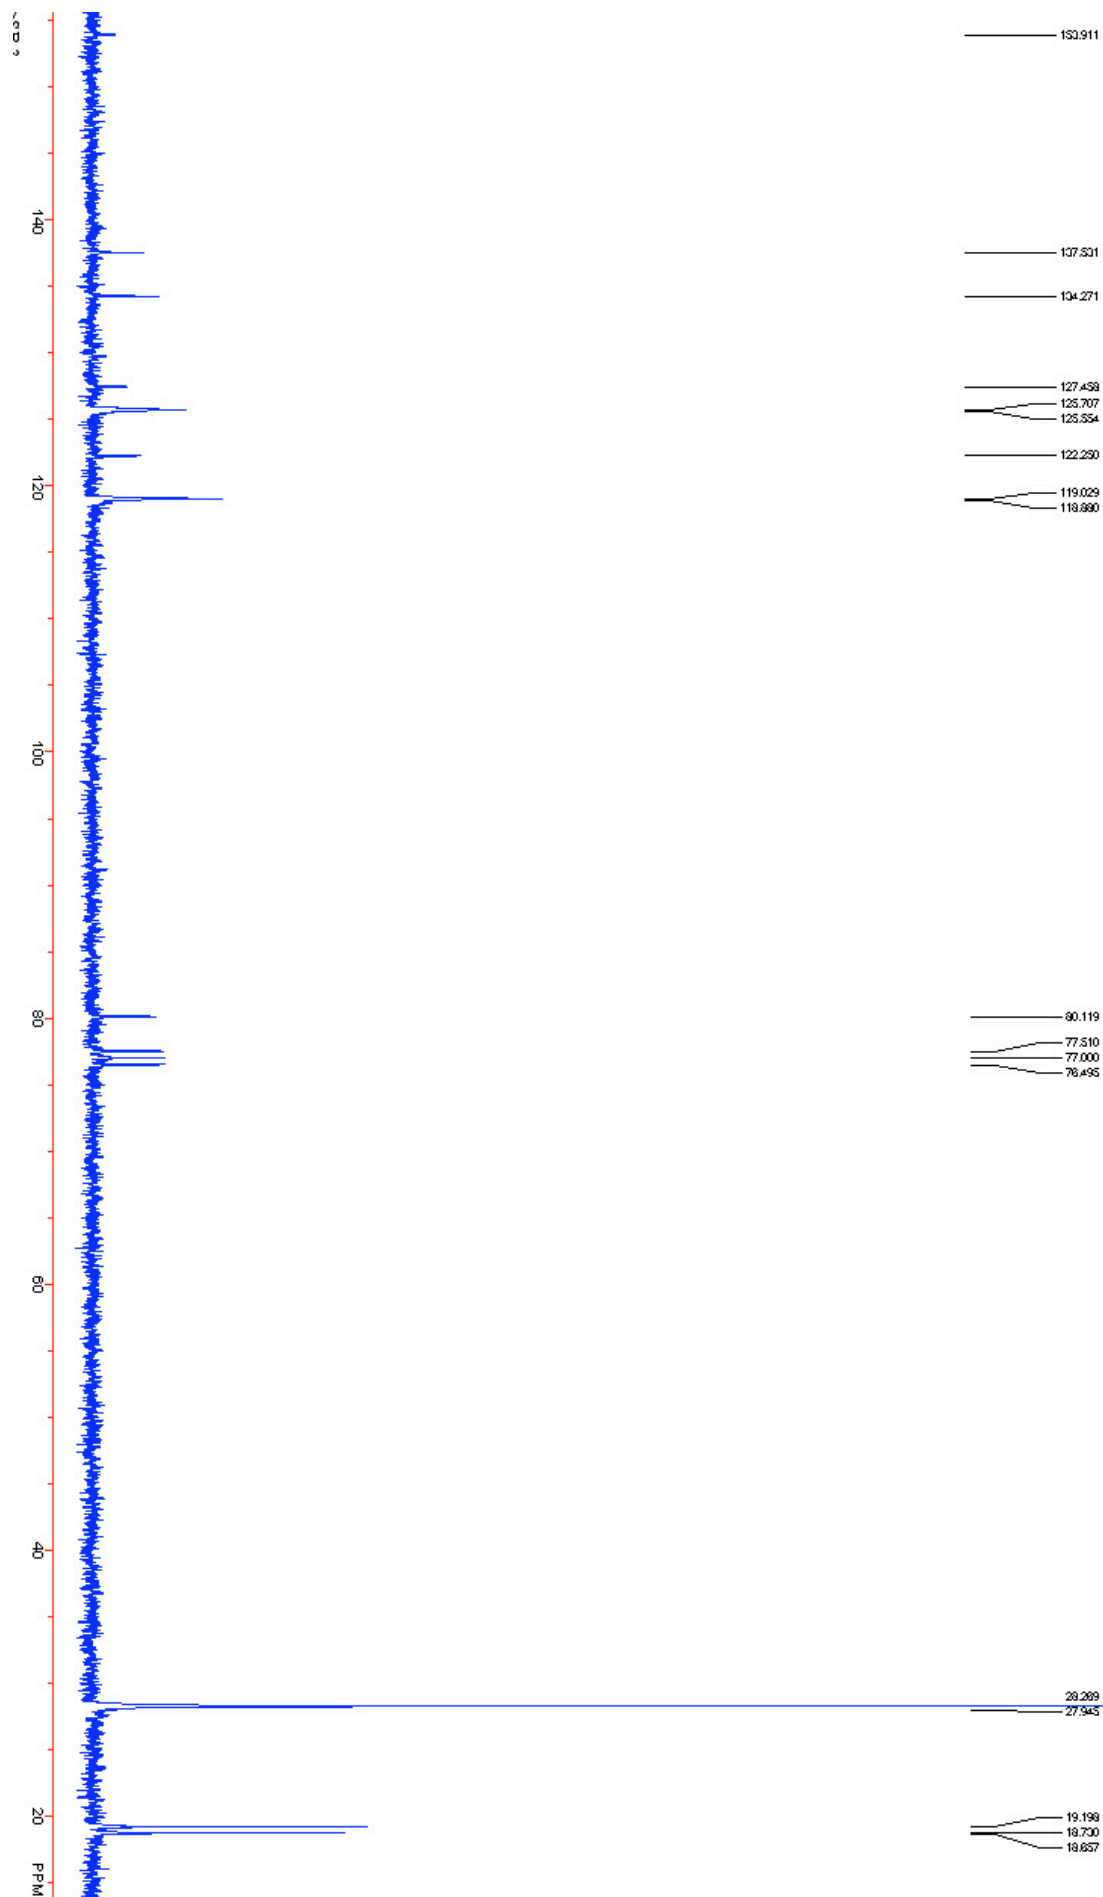

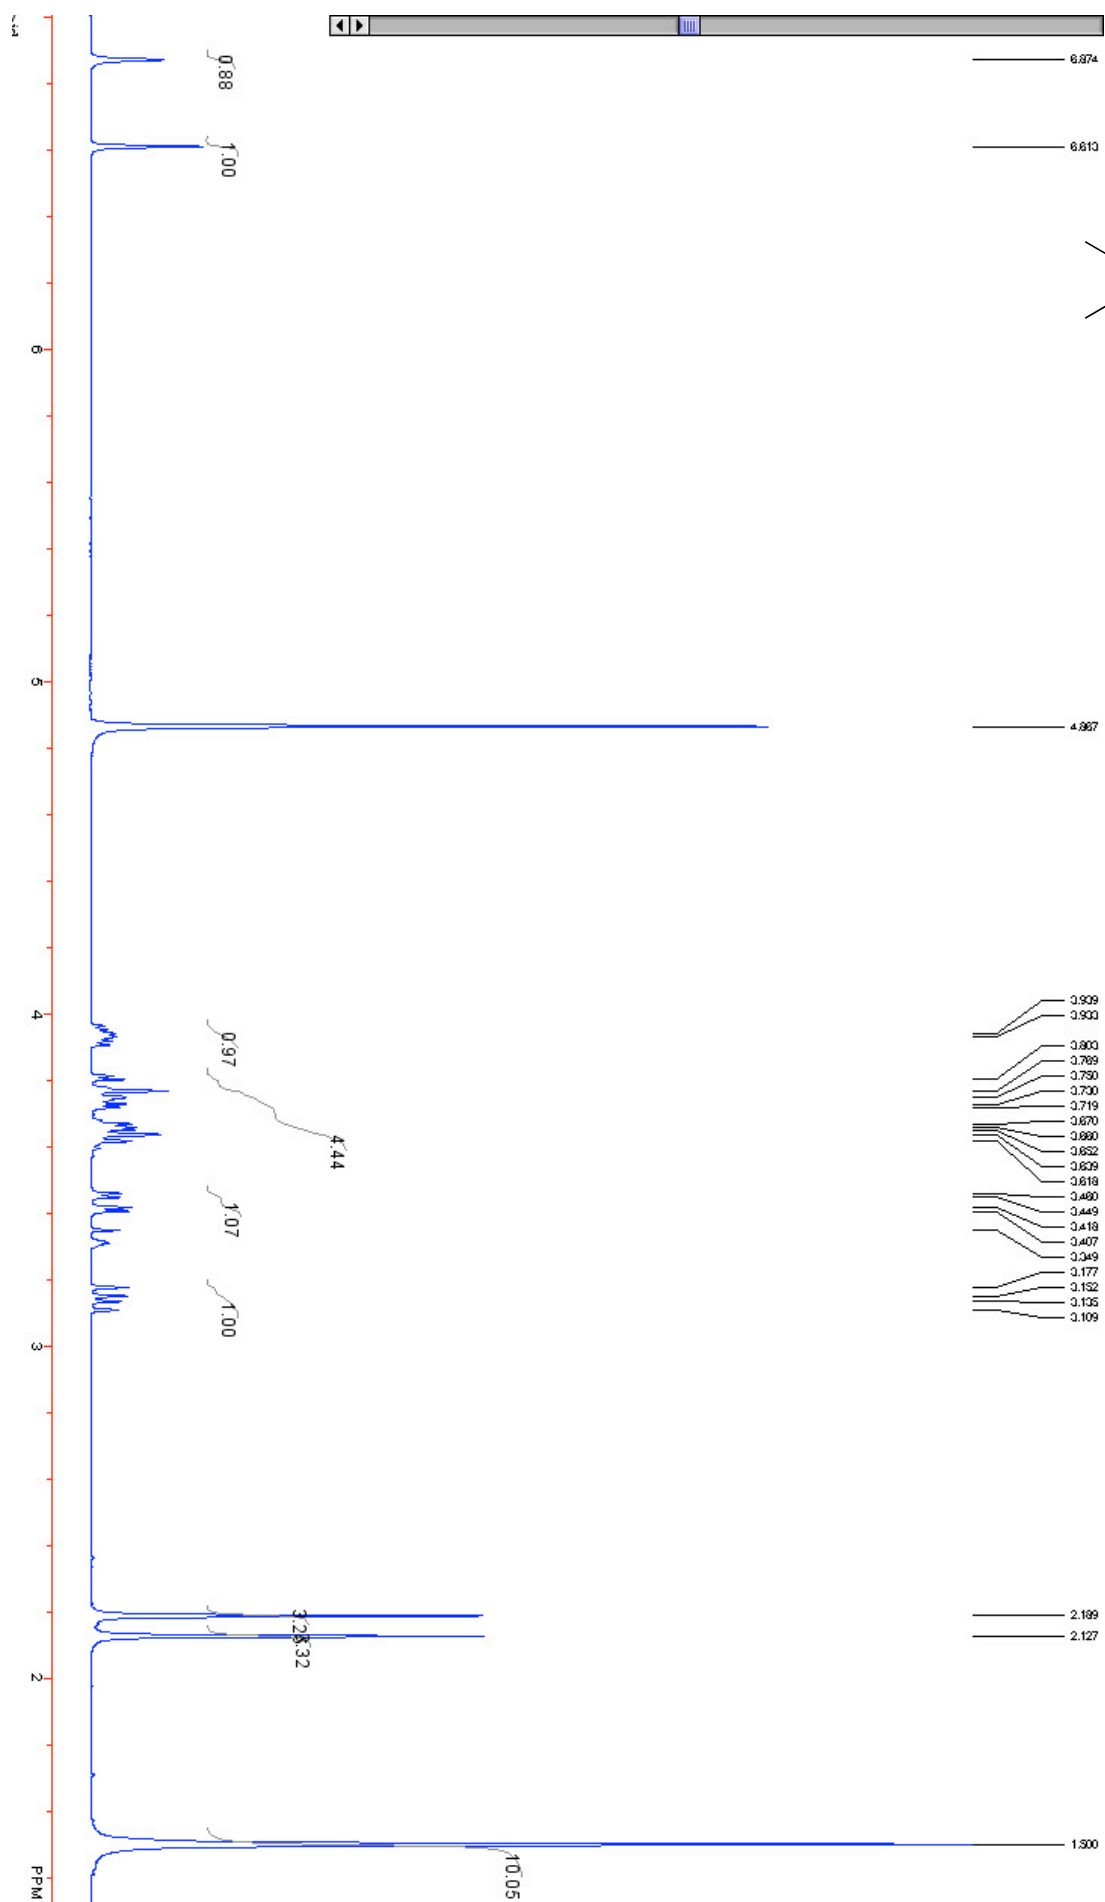

9 intermediate



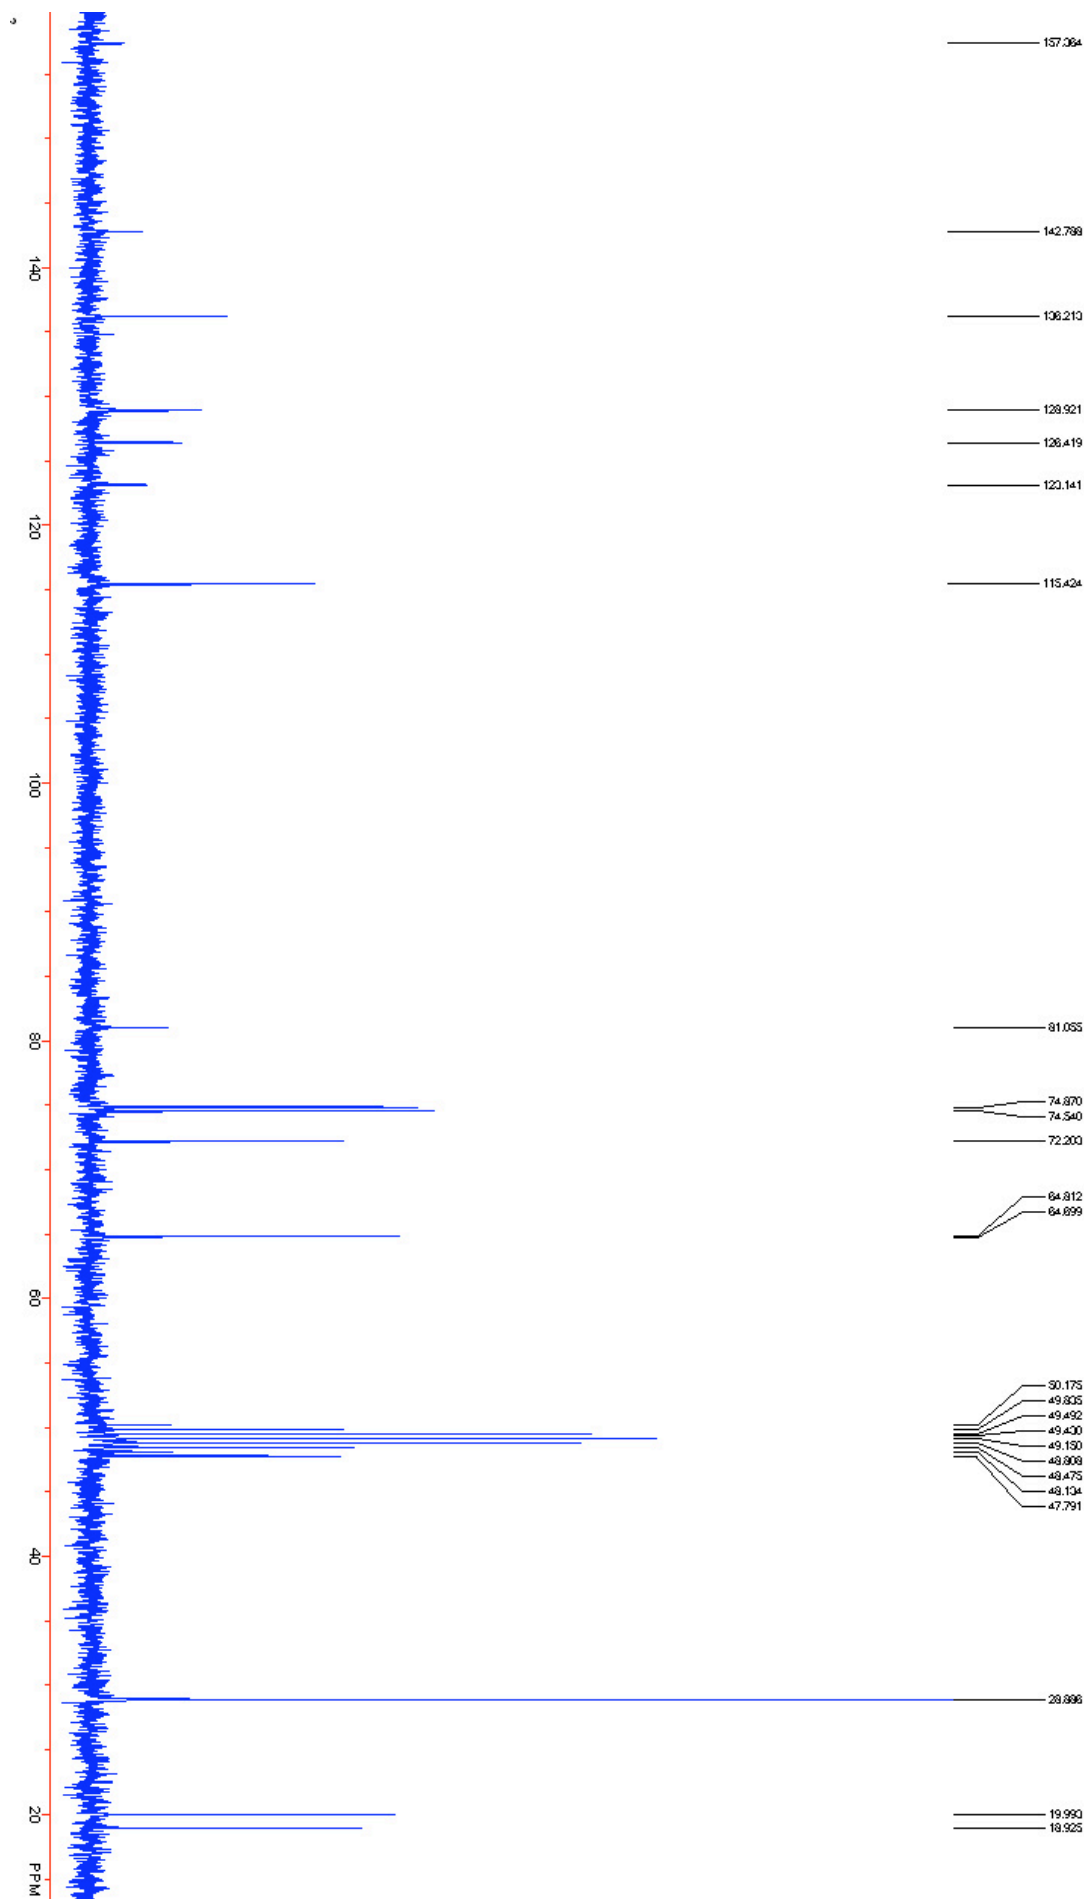

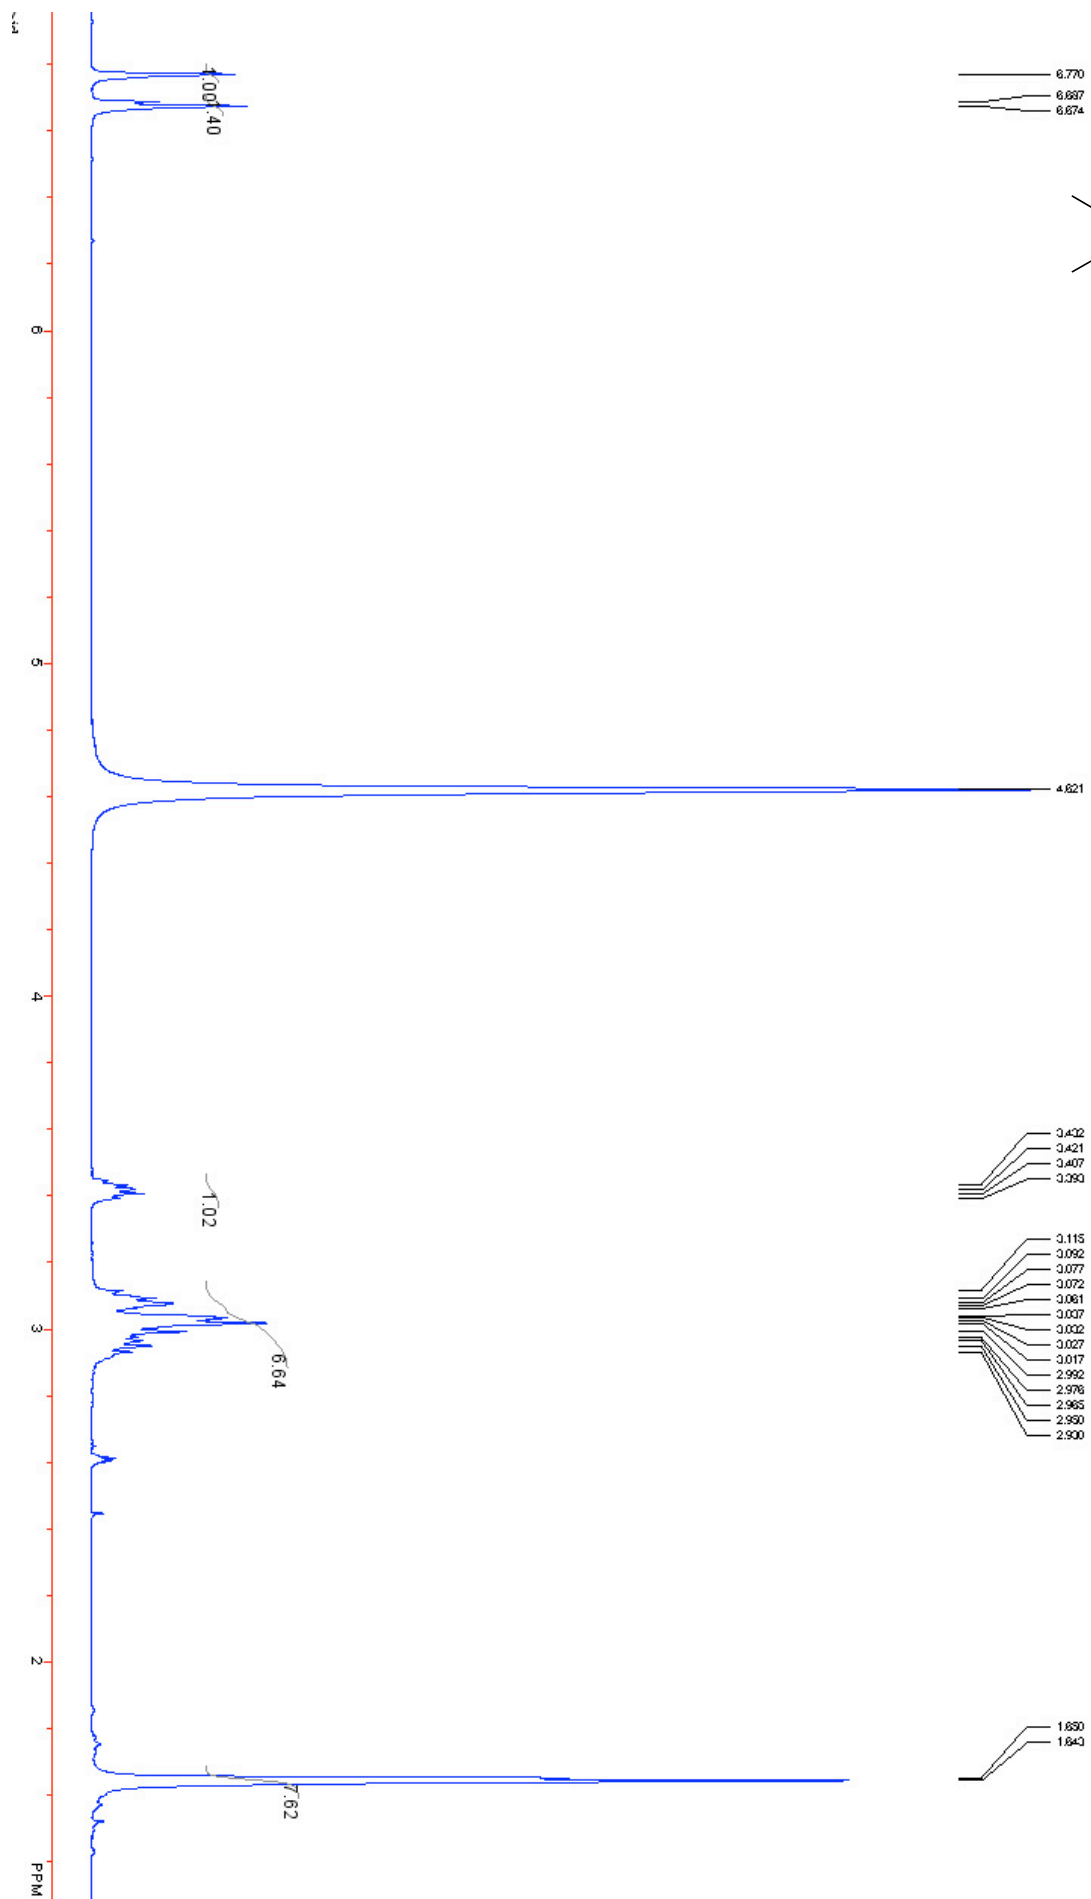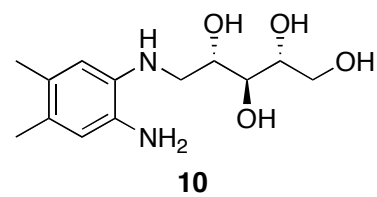

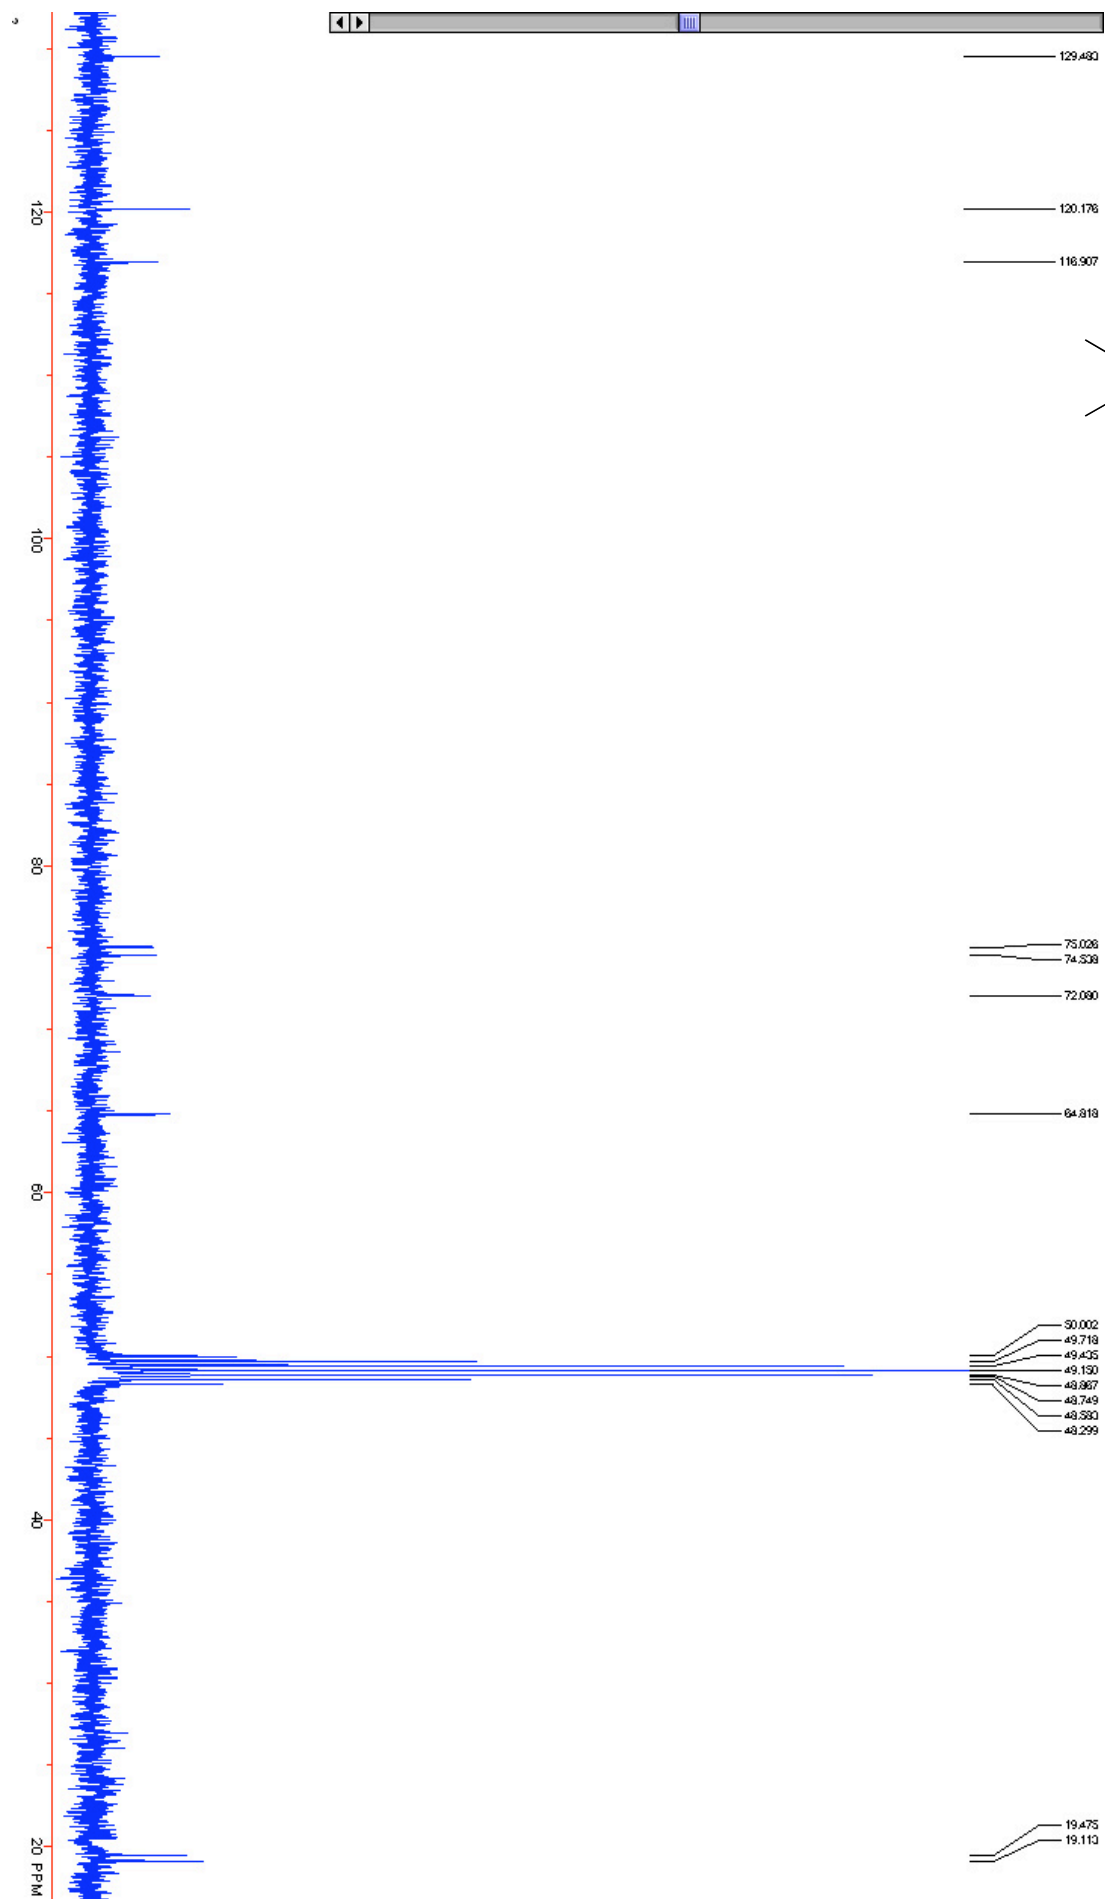

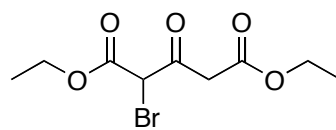

11

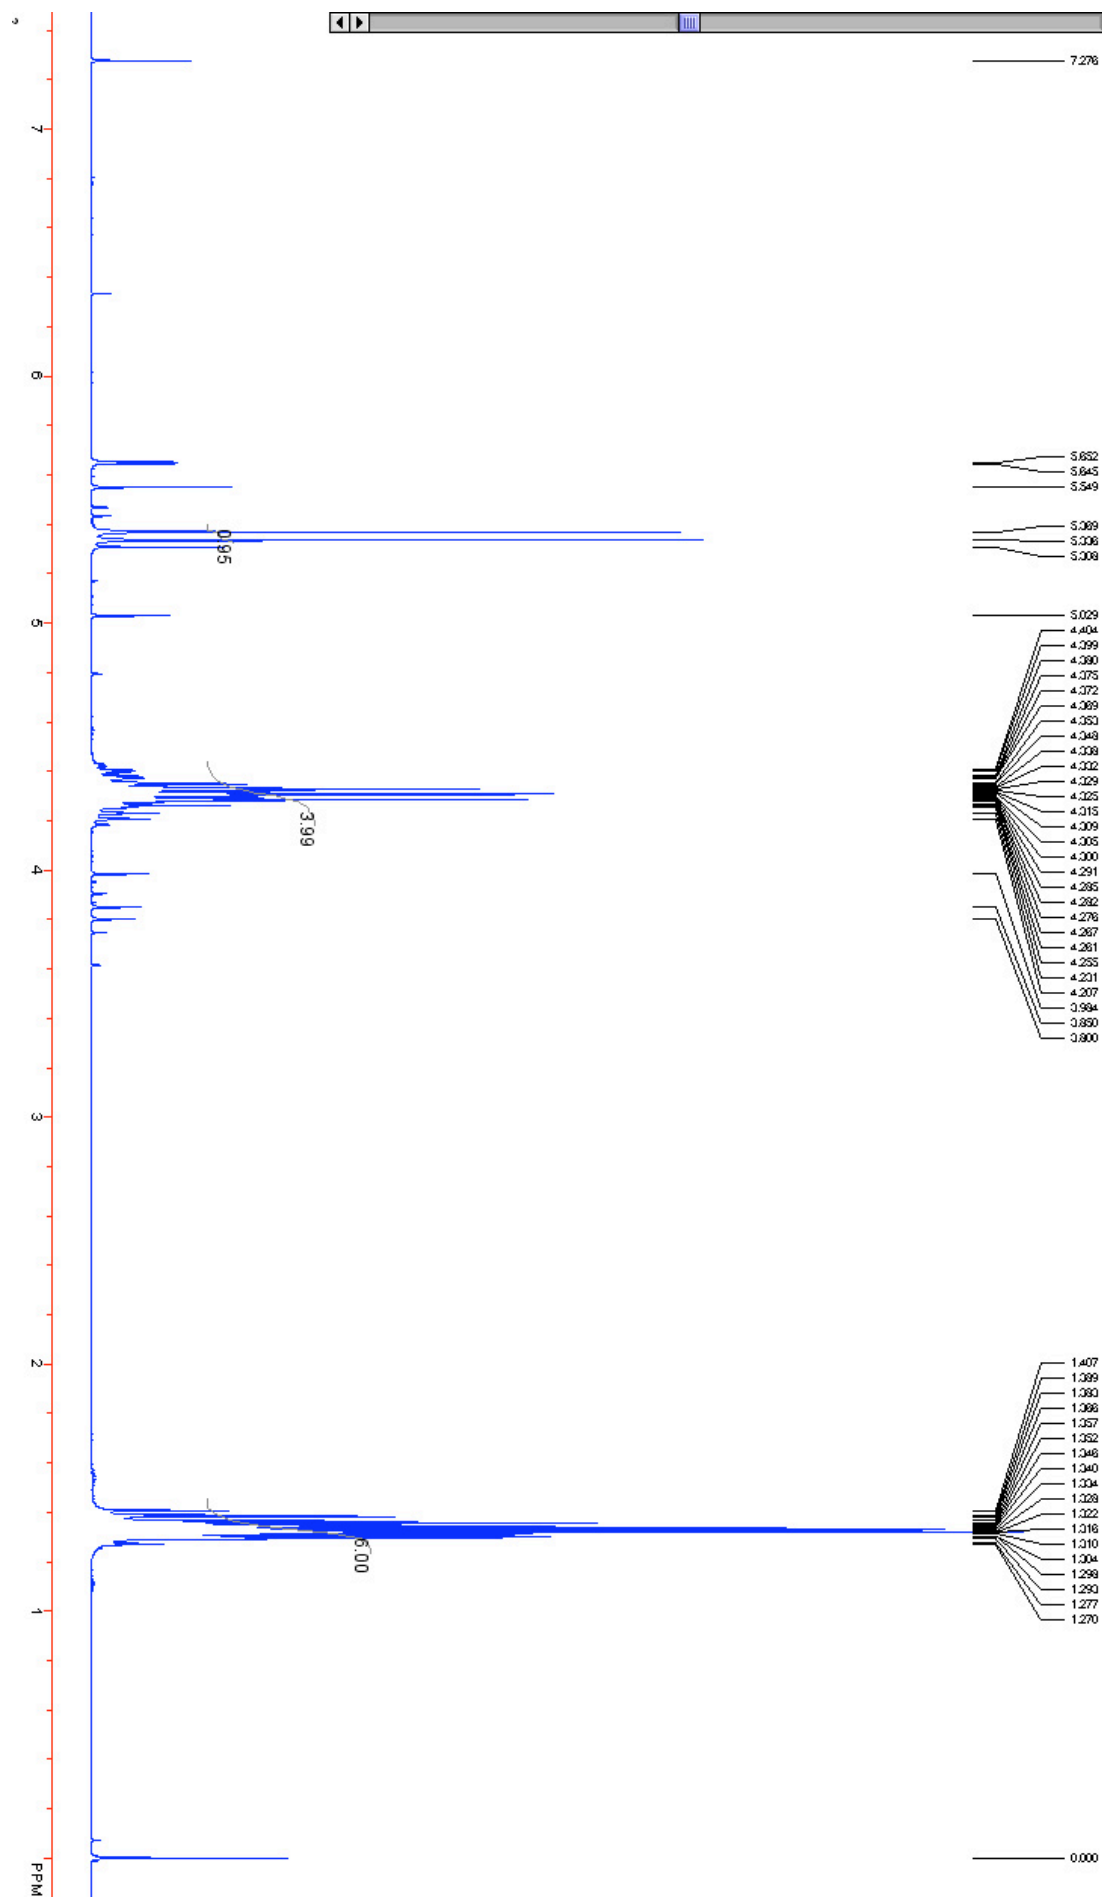

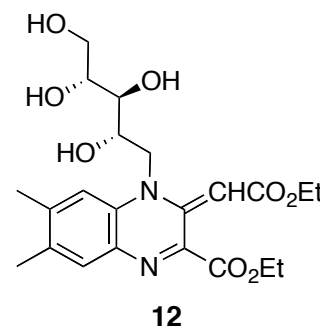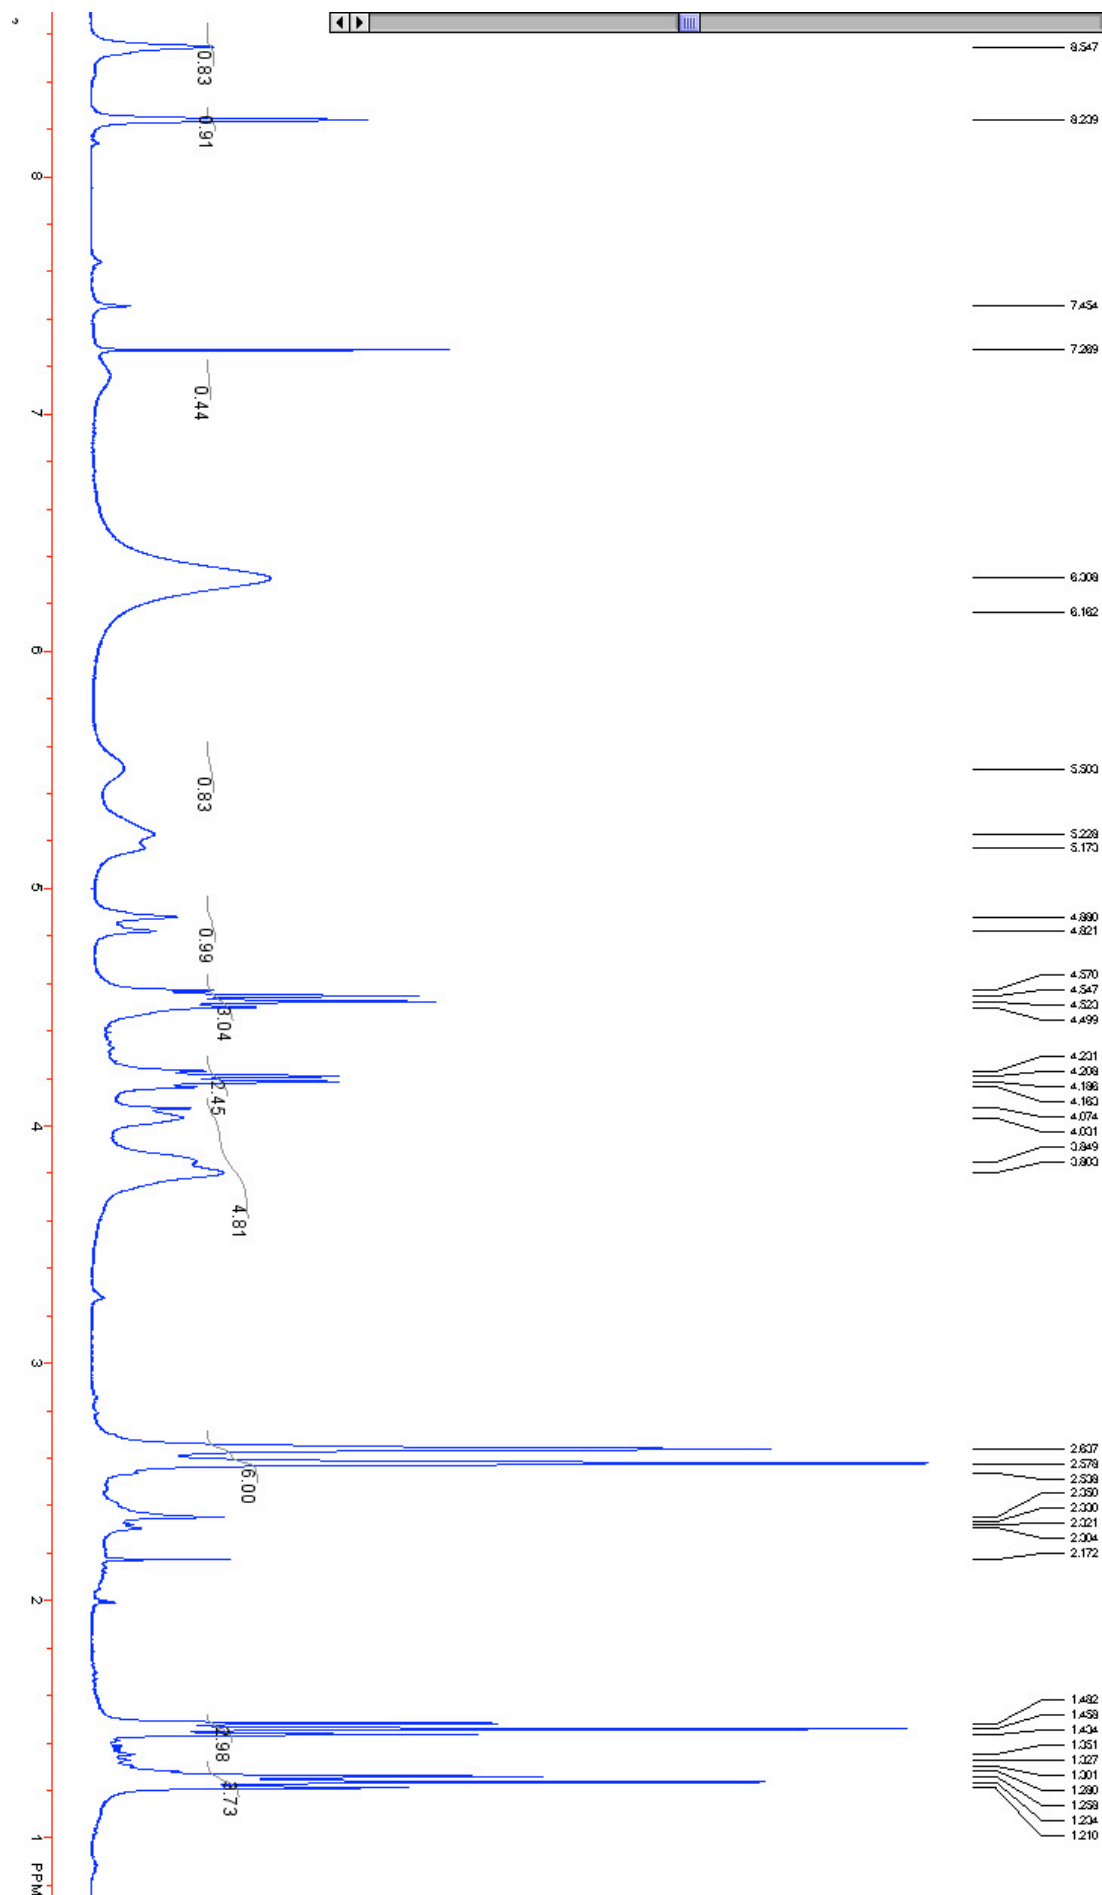

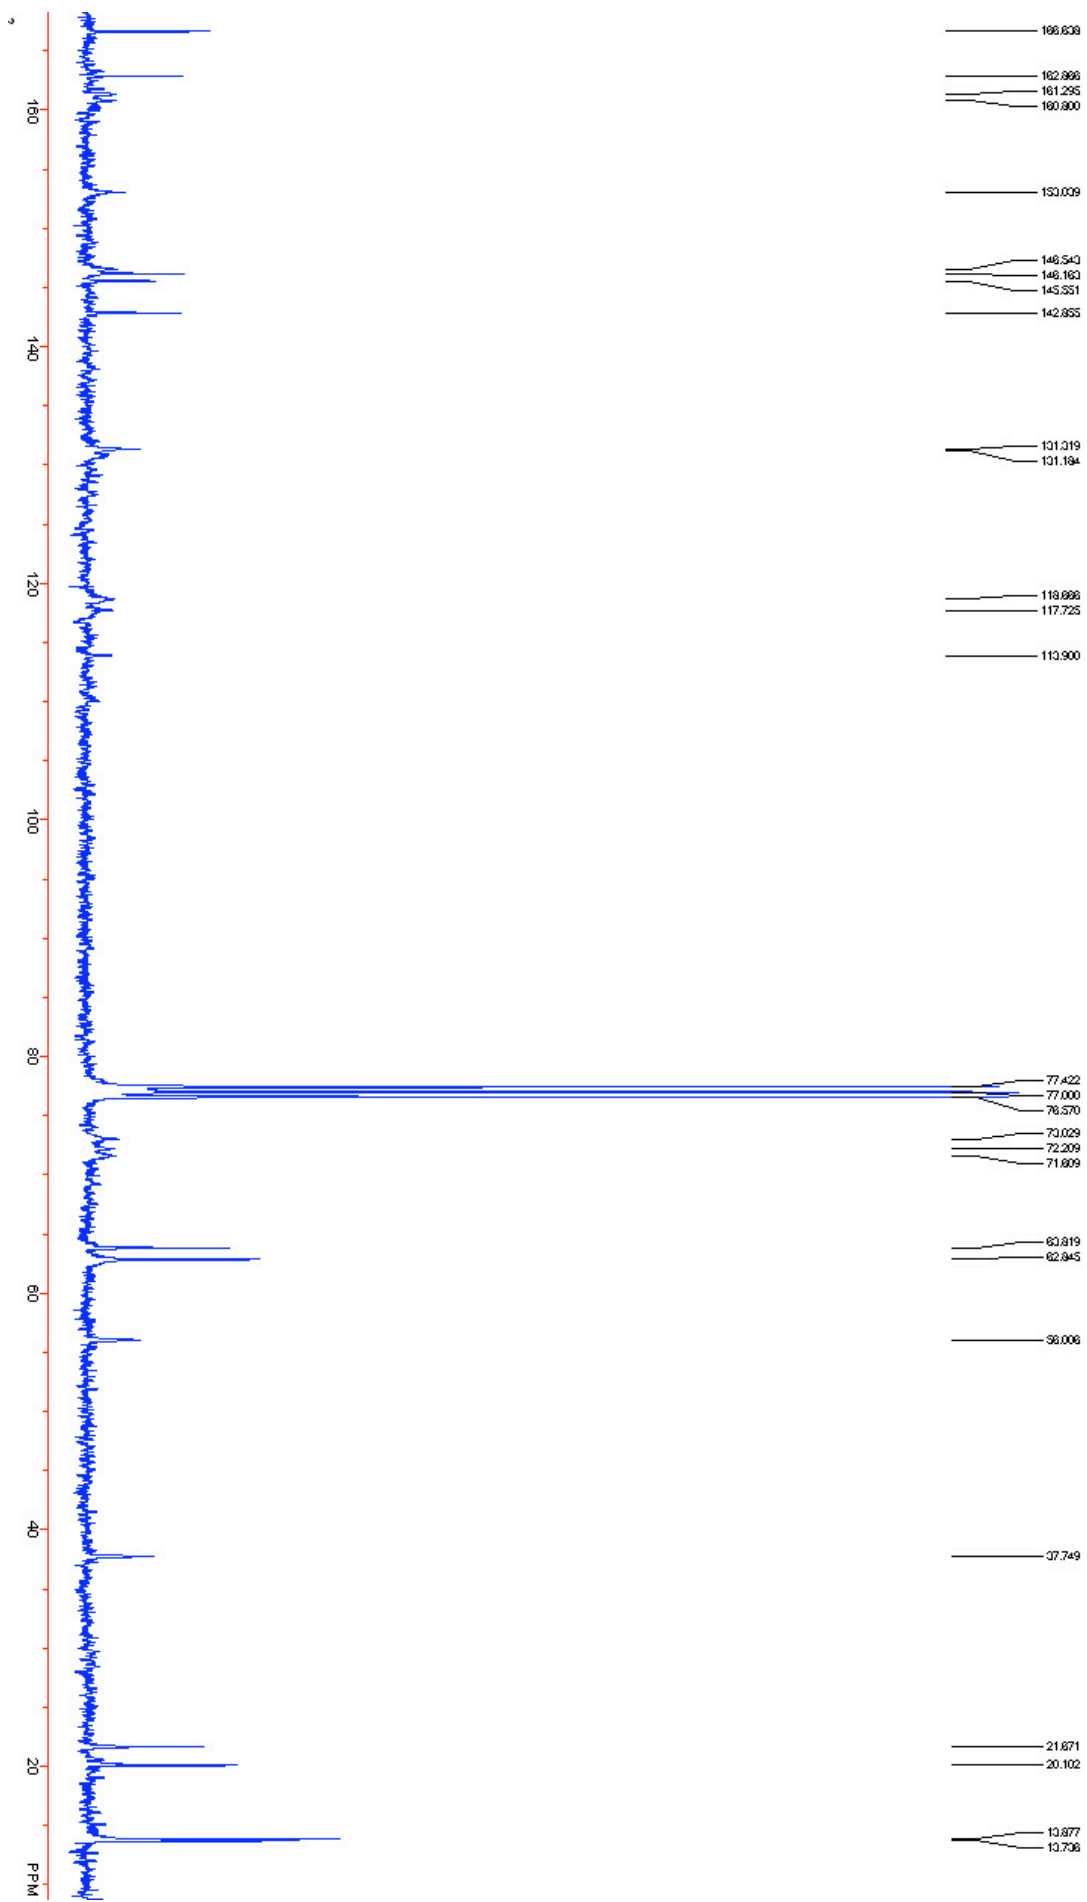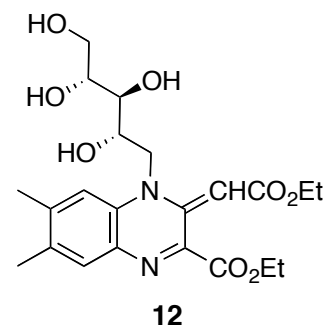

Supplement: Supplementary file 1 [file 5183524]
